1 Manuscript title: Research Article

2

3 **The nasopharyngeal, ruminal, and vaginal microbiota and the core taxa shared**  
4 **across these microbiomes in virgin yearling heifers exposed to divergent in**  
5 **utero nutrition during their first trimester of gestation and in pregnant beef**  
6 **heifers in response to mineral supplementation**

7

8 Samat Amat<sup>1,\*</sup>, Devin B. Holman<sup>2</sup>, Kaycie Schmidt<sup>1</sup>, Ana Clara B. Menezes<sup>3</sup>, Friederike

9 Baumgaertner<sup>3</sup>, Thomas Winders<sup>3</sup>, James D. Kirsch<sup>3</sup>, TingTing Liu<sup>2</sup>, Timothy D.

10 Schwinghamer<sup>4</sup>, Kevin K. Sedivec<sup>5</sup>, Carl R. Dahlen<sup>3</sup>

11

12 <sup>1</sup>*Department of Microbiological Sciences, North Dakota State University, Fargo, ND, 58108,*

13 *USA*

14 <sup>2</sup>*Lacombe Research and Development Centre, Agriculture and Agri-Food Canada, 6000 C & E*

15 *Trail, Lacombe, AB, T4L 1W1, Canada*

16 <sup>3</sup>*Department of Animal Sciences, North Dakota State University, Fargo, ND, 58102, USA.*

17 <sup>4</sup>*Agriculture and Agri-Food Canada, Lethbridge Research and Development Centre, Lethbridge,*

18 *AB, Canada,*

19 <sup>5</sup>*Central Grasslands Research Extension Center, North Dakota State University, Streeter, ND,*

20 *58483, USA.*

21

22 \*Correspondence: [Samat.amat@ndsu.edu](mailto:Samat.amat@ndsu.edu); Tel.: +1-701-231-7520

23

24

25 **ABSTRACT:**

26 Emerging evidence has indicated that microbial transmission from the bovine dam to her  
27 fetus may take place before birth, and that the maternal microbiota during pregnancy modulates  
28 programming of fetal metabolic and nervous system development, highlighting the potential and  
29 extended role of the maternal microbiome in calf health and development. In the present study,  
30 we characterized the nasopharyngeal, ruminal and vaginal microbiota from two cohorts of beef  
31 heifers managed at the same location: 1) virgin yearling heifers (9 months old) born from dams  
32 received gestational diets which resulted in low (LG, n = 22) or medium (MG, n = 23) weight gain  
33 during the first 84 days of gestation; and 2) pregnant replacement heifers that received a vitamin  
34 and mineral supplement (VTM, n = 17) or not (Control, n = 15) during the first 6 months of  
35 gestation. Nasopharyngeal and vaginal swabs as well as ruminal fluid were collected from both  
36 cohorts and the microbiota of each sample was assessed using 16S rRNA gene sequencing. In  
37 addition to the comparison between treatment groups within each cohort, the similarity of the  
38 microbiota of the three sample types were evaluated, and shared taxa amongst these communities  
39 were identified. The bacterial genera present in the rumen and vagina that can influence  
40 methanogenic archaeal genera were predicted using a stepwise-selected generalized linear mixed  
41 model. No significant difference was observed in the alpha and beta diversity in any of the  
42 nasopharyngeal, ruminal and vaginal microbiota between LG and MG offspring virgin heifers, or  
43 between the control and VTM pregnant heifers ( $p > 0.05$ ). Subtle compositional changes in the  
44 vaginal microbiota in yearling heifers, and in the nasopharyngeal and ruminal microbiota of  
45 pregnant heifers were detected in response to treatments. Forty-one archaeal and bacterial OTUs  
46 were shared by over 60% of all samples from both virgin and pregnant heifers. Two taxa within  
47 the *Methanobrevibacter* genus were identified as core taxa and this genus was more relatively

48 abundant in pregnant heifers compared to virgin heifers. Among the 25 top genera, *Prevotella* and  
49 *Prevotella* UCG-003 (negative) and *Christensenellaceae R-7* group (positive) were predicted to  
50 have a significant effect on ruminal *Methanobrevibacter* spp. The results of this study indicate  
51 that there is little impact of divergent gestational nutrition during the first trimester on the calf  
52 microbiome at 9 months postnatal, and that VTM supplementation during pregnancy may not alter  
53 the maternal microbiome. This study provides evidence that there are several microbial taxa,  
54 including methanogenic archaea, that are shared across the respiratory, gastrointestinal, and  
55 reproductive tracts, suggesting the need for a holistic evaluation of the bovine microbiota when  
56 considering potential maternal sources for seeding calves with pioneer microbiota.

57  
58 **Keywords:** Beef heifers, Core taxa, Maternal nutrition, Nasopharyngeal microbiota, Offspring,  
59 Ruminal microbiota, Vaginal microbiota.

60

61

62

63

64

65

66

67

68

69

70

## 71 INTRODUCTION

72 Host genetic selection has been a primary target for improving animal health and  
73 productivity over the last several decades and has resulted in tremendous progress in both dairy  
74 and beef cattle production systems. Recently, the microbiota colonizing different mucosal surfaces  
75 of cattle have become a new target for manipulation/engineering with great potential to improve  
76 animal health and production (Huws et al., 2018; Matthews et al., 2019). Diverse and dynamic  
77 microbial communities present in the respiratory, gastrointestinal and reproductive tracts of cattle  
78 are vital to health and performance (Galvão et al., 2019; Matthews et al., 2019; Timsit et al., 2020).  
79 Among these microbial communities, the ruminal microbiota in cattle, which is the most densely  
80 populated and involved in both nutrient metabolism and immune system development, has become  
81 the primary target for manipulation/engineering (O'Hara et al., 2020).

82 Recent developments including the advent of high-throughput sequencing techniques,  
83 heritable ruminal microbiota compositional changes that are associated with feed efficiency  
84 (Difford et al., 2018; Li et al., 2019) and methane emission phenotypes in cattle (Difford et al.,  
85 2018), suggest that the ruminal microbiome and host genetics can be targeted independently to  
86 improve feed efficiency and mitigate enteric methane emissions from cattle. One of the challenges  
87 associated with manipulation of the ruminal microbiome in mature animals is its resiliency that  
88 allows the microbiome to revert to the original state following the cessation of an intervention  
89 (Weimer, 2015). To overcome this challenge, early life microbial programming in young  
90 ruminants was recommended and has shown some efficacy (Yáñez-Ruiz et al., 2015; Saro et al.,  
91 2018; Belanche et al., 2020). For example, Palma-Hidalgo et al. (2021) reported that the direct  
92 inoculation of fresh ruminal fluid from adult goats to kids in early life accelerated ruminal  
93 microbial community development and improved the weaning process. Early life microbial

94 programming is based on the current dogma that microbial colonization of the rumen starts at birth,  
95 and the developing ruminal microbiota within the first 3 weeks of life is less resilient to  
96 manipulation (Yáñez-Ruiz et al., 2015). A recent study by Guzman and colleagues (2020),  
97 however, provided sequencing and culture-based evidence indicating that the intestine of calf fetus  
98 is not sterile and colonization by so-called “pioneer” microbes may occur during gestation. This is  
99 further supported by our preliminary data which suggested that colonization of the fetal intestine  
100 by archaea and bacteria may take place within the first 12 weeks of gestation in cattle (Amat et al.,  
101 unpublished data). These observations highlight the potential and extended role of the maternal  
102 microbiome in calf ruminal microbiome development.

103         Although the role of maternal nutrition in programming of the offspring metabolic, immune  
104 and nervous system development has been well documented in humans and food-producing  
105 animals including cattle (Palmer, 2011; Caton et al., 2019), the potential involvement of the  
106 maternal microbiome in the developmental origins of health and disease has recently begun to be  
107 better appreciated (Stiemsma and Michels, 2018; Calatayud et al., 2019; Codagnone et al., 2019).  
108 It was hypothesized that undesired alterations in the maternal microbiota could indirectly influence  
109 fetal development, and that these effects may subsequently be transmitted to progeny, resulting in  
110 the development of an altered microbiota in offspring (Calatayud et al., 2019). Undesirable  
111 outcomes in offspring resulting from changes in the maternal microbiota include increased  
112 susceptibility to the development of metabolic disorders and respiratory infections (Calatayud et  
113 al., 2019; Yao et al., 2020). Recent evidence from studies in mice demonstrated that the maternal  
114 microbiota during pregnancy modulates the programming of fetal metabolic and nervous system  
115 development (Kimura et al., 2020; Vuong et al., 2020). Considering the increased evidence  
116 showing the importance of the maternal microbiota in developmental programming in rodent

117 models, and the greater evidence regarding the involvement of the microbiome in defining cattle  
118 health and productivity, exploring the role of the maternal microbiota in fetal programming and  
119 offspring microbiome development may provide important information for improving cattle health  
120 and feed efficiency.

121 In the present study, we used 16S rRNA gene sequencing to characterize the  
122 nasopharyngeal, ruminal and vaginal microbiota of virgin yearling heifers from dams given  
123 different nutritional diets during their first trimester of gestation, and in pregnant beef heifers in  
124 response to direct feeding of a mineral and vitamin (VTM) supplement during the first 6 months  
125 of gestation. Of note, a well-defined positive impact of maternal VTM supplementation exists on  
126 offspring health and performance in beef cattle, and the role of VTM on fetal programming  
127 assessed during the first trimester of pregnancy have been documented (Mee et al., 1995; Wilde,  
128 2006; Van Emon et al., 2020; Diniz et al., 2021; Menezes et al., 2021). Questions remain, however,  
129 pertaining to whether these maternal VTM supplementation-associated positive outcomes are  
130 dependent on VTM-induced alterations of ruminal microbiota. To provide a more holistic view  
131 of the microbiota residing within the respiratory, gastrointestinal, and reproductive tract of cattle,  
132 the similarity of the microbiota within these sites was evaluated, and taxa shared amongst the three  
133 microbial habitats were identified. Given the relevance of these microbial communities to  
134 respiratory and reproductive health and rumen fermentation/nutrient metabolism, and most  
135 importantly, as potential maternal inoculant sources for seeding the fetal and offspring microbiota,  
136 a holistic evaluation of bovine microbiota is therefore necessary rather than focusing on only one  
137 microbial community.

## 138 MATERIALS AND METHODS

139 Animals used in this study were cared for in accordance with the guidelines set by the  
140 Olfert et al. (1993) and all experimental procedures involving cattle were approved by the North  
141 Dakota State University Institutional Animal Care and Use Committee (#A20085 and #A20085,  
142 for virgin yearling heifers and for pregnant heifers, respectively).

### 143 Animal Husbandry and Experimental Design

#### 144 *Virgin yearling heifers:*

145 Deep nasopharyngeal swabs, ruminal fluid, and vaginal swabs were collected from 45 F1  
146 virgin heifers (9-month-old, BW = 688 ± 57 kg) whose dams were assigned to either a low gain  
147 treatment (**LG**, targeted average daily gain of 0.28 kg/d, n = 22) or a moderate gain treatment  
148 (**MG**, 0.79 kg/d, n = 23) during the first 84 days of gestation. To achieve the LG, dams were  
149 maintained on a basal diet consisting of prairie grass hay, corn silage, and dried distillers grains  
150 plus solubles. To achieve the MG (0.79 kg/d), heifers were fed the basal diet with the addition of  
151 a protein/energy supplement fed at the rate of 0.58% BW as-fed daily. Up to d 84 of gestation  
152 dams were housed and individually fed (Insentec; Hokofarm B.V. Repelweg 10, 8316 PV  
153 Marknesse, the Netherlands) at the Beef Cattle Research and Extension Center (BCRC) in Fargo,  
154 ND. After day 84 of gestation, dams were transported to the Central Grasslands Research  
155 Extension Center (CGREC) in Streeter, ND, where they were managed as a single group on  
156 common diets until parturition and subsequent weaning of the F1 offspring. Upon weaning, the F1  
157 heifers (approx. 6-months old) were transported to the BCRC where they were housed in two pens  
158 and individually fed (Insentec; Hokofarm B.V. Repelweg 10, 8316 PV Marknesse, the  
159 Netherlands) a common diet (Table 1).

#### 160 *Pregnant heifers:*

161 The nasopharyngeal, ruminal, and vaginal microbiota of the replacement pregnant heifers  
162 (1 year 9 months old, BW = 1001 ± 128 kg) during the sixth month of gestation were also  
163 evaluated. At breeding, heifers were assigned to one of two treatments: 1) vitamin and mineral  
164 supplementation (**VTM**; n = 17) or 2) no vitamin and mineral supplementation (**Control**; n = 15).  
165 Heifers were housed at the BCRC and individually fed (Insentec; Hokofarm B.V. Repelweg 10,  
166 8316 PV Marknesse, the Netherlands) a total mixed ration containing triticale hay, corn silage,  
167 modified distillers grains plus solubles, ground corn, and, if indicated by treatment, a VTM premix  
168 (Table 1). The VTM premix was fed at 0.45 kg/heifer/day to provide macro and trace minerals and  
169 vitamins A, D, and E to meet 110% of the daily requirements (NASEM, 2016). The specific  
170 ingredients within the VTM supplement are as previously described (Menezes et al., 2021).

#### 171 **Nasopharyngeal swab, ruminal fluid, and vaginal swab sampling**

172 Nasopharyngeal swabs, ruminal fluid and vaginal swabs were collected simultaneously  
173 from each of the virgin yearling and pregnant heifers by same personnel on the same day. All  
174 sample collection was completed within 4 hours.

175 *Nasopharyngeal sampling:* Deep nasopharyngeal swabs were collected as previously  
176 described (Holman et al., 2017; Amat et al., 2019). Briefly, prior to sampling, the right nostril of  
177 the heifer was wiped clean with 70% ethanol and an extended guarded swab (27 cm) with a rayon  
178 bud (MW 128, Medical Wire & Equipment, Corsham, England) was used for sampling. Swab tips  
179 were then be cut and placed in a sterile 2 mL centrifuge tube on ice until processing. Upon arrival  
180 in the lab, the swab was transferred into 1 mL sterile brain heart infusion (BHI) broth containing  
181 20% glycerol stock.

182 *Rumen fluid sampling:* Rumen fluid sample collection was performed using the method  
183 currently used in our laboratory which was modified from Paz et al. (2016). Briefly, a rigid metal



184 speculum was placed into the mouth of the heifer and then a flexible plastic tube with multiple  
185 holes at the tip was passed through the speculum and into the esophagus. The speculum was used  
186 to ensure that the plastic tube was not damaged by the heifers and that the tube entered the  
187 esophagus. Once the tube entered the rumen, and was below the ruminal mat layer, suction pressure  
188 was applied to the tube to collect ruminal fluid. Up to 120 mL of ruminal fluid was collected on  
189 each sampling day. Separate tubing and containers were used for each heifer to avoid cross-  
190 contamination. After thorough mixing, an aliquot of 40 ml of rumen fluid was placed into a 50 mL  
191 falcon tube and immediately frozen with dry ice.

192 *Vaginal sampling:* For vaginal sampling, the vulva was thoroughly cleaned with 70%  
193 ethanol and a paper towel. Then the labia majora of the vulva was held open allowing the passage  
194 of a swab (15 cm, sterile cotton tipped applicators with aerated tip protector; Puritan). When the  
195 swab tip reached the midpoint of the vaginal cavity, it was placed against the vaginal wall, swirled  
196 four times, and then withdrawn carefully to minimize contamination. The vaginal swabs were  
197 immediately placed in sterile Whirl Pak bags and transported on ice to the lab. All nasopharyngeal  
198 and vaginal swabs as well as rumen fluid were stored at -80°C until DNA extraction.

### 199 **Metagenomic DNA extraction**

200 Metagenomic DNA was extracted from the nasopharyngeal and vaginal swabs using a  
201 Qiagen DNeasy Tissue kit (Qiagen Inc., Germantown, MD, USA) according to the kit manual with  
202 minor modifications. Briefly, the cotton tip of the nasopharyngeal swab was removed and placed  
203 back into the BHI-glycerol mixture, and then centrifuged at  $20,000 \times g$  for 5 min at 4°C to pellet  
204 the cotton and microbes. The pellet was then re-suspended in 180  $\mu$ l of enzymatic buffer. The  
205 enzymatic buffer [20 mM Tris.Cl (pH 8.0), 2mM sodium EDTA, and 1.2% Triton X-100]  
206 contained 300 U/ml mutanolysin and 20 mg/ml lysozyme. The mixture was then vortexed and

207 incubated for 1 h at 37°C with agitation at 800 rpm. After incubation, 25 µl proteinase K and 200  
208 µl Buffer AL (without ethanol) were added and vortexed, and then incubated at 56°C for 30 min  
209 with agitation at 800 rpm. Approximately 400 mg of 0.1 mm zircon/silica beads were added to  
210 the tube and subjected to mechanical cell lysis using a FastPrep-24 Classic bead beater (MP  
211 Biomedicals, Irvine, CA) at 4.0 m/s for 24 s. The mixture was then centrifuged (13,000 × g for  
212 5min), and the supernatant (approx. 300-400 µl) was removed and placed in a new tube and mixed  
213 with an equal volume of 100% ethanol. From this step onward, the procedures were performed as  
214 described in the DNeasy Tissue Kit instruction manual.

215         The procedures for metagenomic DNA extraction from the vaginal swabs were identical  
216 to those used on the nasopharyngeal swabs with the following exceptions. First, the cotton swab  
217 was removed from applicator and placed in a sterile 2 mL centrifuge tube. Then, 360 µl of  
218 enzymatic buffer was added to the tube to ensure complete emersion of the swab in the enzymatic  
219 buffer. Metagenomic DNA from the rumen fluid samples was extracted using the Qiagen DNeasy  
220 PowerLyzer PowerSoil kit (Qiagen Inc.) according to the instructions of manufacturer. The frozen  
221 rumen fluid samples were thawed, and vortexed thoroughly before transfer to a sterile 2 mL  
222 microfuge tube. The sample was then centrifuged at 20,000 × g for 10 min at 4°C to pellet the  
223 microbes in the sample. From this point onwards, the protocol for the PowerLyzer PowerSoil kit  
224 was followed as per the instructions of the manufacturer. Negative extraction controls were  
225 included for all extraction kits.

## 226 **16S rRNA gene sequencing and analysis**

227         The V3-V4 hypervariable regions of the 16S rRNA gene were amplified using the 341-F  
228 (5'-CCTAYGGGRBGCASCAG-3') and 806-R (5'-GGACTACNNGGGTATCTAAT-3') primers.  
229 All PCR steps were carried out using the Phusion High-Fidelity PCR Master Mix (New England

230 Biolabs). The PCR products were electrophoresed on a 2% agarose gel and stained with SYBR  
231 Safe DNA gel stain. The DNA fragment was excised from the gel and purified using the QIAquick  
232 Gel Extraction Kit (Qiagen Inc.,). Sequencing libraries were generated with NEBNext Ultra DNA  
233 Library Prep Kit (New England BioLabs, Ipswich, MA, USA) for Illumina, following the  
234 recommendations of the manufacturer. The library quality was assessed with a Qubit 2.0  
235 Fluorometer (Thermo Scientific) and Agilent Bioanalyzer 2100 system. Libraries were then  
236 sequenced on a NovaSeq 6000 instrument with a SP flow cell (2 x 250 bp) (Illumina Inc., San  
237 Diego, CA, USA).

238         The 16S rRNA gene sequences were processed using DADA2 v. 1.18 (Callahan et al.,  
239 2016) in R. 4.0.3. Briefly, the forward reads were truncated at 225 bp and the reverse reads at 220  
240 bp. The reads were merged, chimeric sequences removed, and taxonomy assigned to each merged  
241 sequence, referred to here as operational taxonomic units (OTUs) at 100 % similarity, using the  
242 naïve Bayesian RDP classifier (Wang et al., 2007) and the SILVA SSU database release 138  
243 (Quast et al., 2013). OTUs that were predominantly in the negative extraction control samples and  
244 likely to be contaminants were removed prior to analyses as were those OTUs classified as  
245 chloroplasts, mitochondria, or eukaryota. The number of OTUs per sample (richness), the Shannon  
246 and inverse Simpson's diversity indices, and Bray-Curtis dissimilarities were calculated in R using  
247 Phyloseq 1.34.0 (McMurdie and Holmes, 2013) and vegan 2.5-7 (Oksanen et al., 2013). To  
248 account for uneven sequence depths, samples were randomly subsampled to 7,100, 73,500, and  
249 10,300 for the nasopharyngeal, ruminal, and vaginal samples respectively, prior to the calculation  
250 of Bray-Curtis dissimilarities and diversity measures for the virgin heifers. For the pregnant  
251 heifers, these values were 6,200, 74,500, and 8,200.

## 252 **Statistical Analysis**

253           Permutational multivariate analysis of variance (PERMANOVA; adonis2 function; 10,000  
254 permutations) of the Bray-Curtis dissimilarities was performed using vegan to determine the effect  
255 of maternal nutrition on the nasopharyngeal, ruminal and vaginal microbial community structure  
256 in virgin heifers whose dams were managed to targeted LG or MG during the first 84 days of  
257 gestation. The effect of VTM supplementation on the microbial community structure of these three  
258 microbiotas in pregnant heifers was also assessed. Differentially abundant genera between  
259 treatment groups for both the virgin and pregnant heifers were identified using MaAsLin2 v. 1.5.1  
260 in R (Mallick et al., 2021). Only those genera with a relative abundance greater than 0.1% within  
261 each sample type were included. Diversity metrics were compared by treatment for both virgin  
262 and pregnant heifers using an unpaired *t*-test. The number of OTUs (richness), diversity indices,  
263 relative abundance of the most relatively abundant genera between the LG and MG groups of  
264 virgin yearling heifers, or between the VTM and Control groups of pregnant heifers, and the  
265 relative abundance of *Methanobrevibacter* spp. between the virgin and pregnant heifers were  
266 compared using the generalized liner mixed model estimation procedure (PROC GLIMMIX) in  
267 SAS (ver. 9.4, SAS Institute Inc. Cary, NC). The means were compared using the LSMEANS  
268 statement and significance was declared at  $P < 0.05$ .

269           Spearman's rank-based correlations between *Methanobrevibacter* and the other 24 most  
270 relatively abundant genera in the ruminal and vaginal microbiota were calculated using the CORR  
271 procedure in SAS with the SPEARMAN option. From these 24 genera, the genera that have  
272 significant effect on *Methanobrevibacter* abundance were predicted using a stepwise-selected  
273 GLIMMIX model with beta-binomial distribution as described previously (Amat et al., 2019). The  
274 model used was:  $\text{logit}(\hat{Y}) = \ln(\pi/(1 - \pi)) = b_0 + b_1(X_1) + \dots + b_n(X_n)$ , where  $\pi$  represents the

275 relative abundance of the *Methanobrevibacter* genus (0–1) and X<sub>n</sub> represents the relative  
276 abundance (0–100%) of a bacterial genus n. The stepwise selection method involved backward  
277 elimination and forward selection to eliminate any variables in the model that have no significant  
278 effect ( $p > 0.05$ ) on the predicted outcome.

279

## 280 **RESULTS**

### 281 **Sequencing Results**

282 An average of  $66,045 \pm 31,588$  (SD) 16S rRNA gene sequences per sample (min. = 2,374;  
283 max. = 139,012) were obtained from 219 nasopharyngeal, ruminal fluid, and vaginal samples.  
284 From these sequences, a total of 81,391 archaeal and bacterial OTUs were identified and classified  
285 into 58 unique phyla (8 archaeal and 50 bacterial phyla), and 1,511 unique genera.

### 286 **Effect of Maternal Restricted Gain During the First Trimester of Gestation on Offspring**

#### 287 **Microbiota Development**

288 To determine the effect of maternal nutrition during the first trimester of gestation on  
289 microbial populations of their offspring, we characterized and compared the nasopharyngeal,  
290 ruminal and vaginal microbiota of virgin yearling heifers from two groups of dams that were  
291 subjected to diets resulting in either a LG or MG phenotype during the first 84 days of gestation.  
292 The microbial community structure of the nasopharynx (PERMANOVA:  $R^2 = 0.027$ ,  $p = 0.57$ ),  
293 rumen (PERMANOVA:  $R^2 = 0.02$ ,  $p = 0.98$ ) and vagina (PERMANOVA:  $R^2 = 0.028$ ,  $p = 0.37$ )  
294 in the virgin heifers did not differ between the LG and MG groups (Fig. 1A). Microbial richness  
295 and diversity as measured by the number of OTUs, and the Shannon and inverse Simpson's  
296 diversity indices of these microbiotas also did not significantly differ by maternal nutrition group

297 (Fig. 1B, C and D;  $p > 0.05$ ). There was, however, a strong tendency ( $p = 0.06$ ) in LG offspring to  
298 harbor a richer ruminal microbial community compared to MG offspring (2605 vs. 2515 OTUs).

299 The nasopharyngeal microbiota across all animals was dominated by *Actinobacteriota*  
300 (51%), *Firmicutes* (28.2%), *Bacteroidota* (10.8%) and *Proteobacteria* (4.9%). The relative  
301 abundance of the eight most relatively abundant phyla did not differ between LG and MG virgin  
302 heifers ( $p > 0.05$ ) (Fig. 2A). *Bacteroidota* was the most relatively abundant phylum in the ruminal  
303 microbiota (65.5%) followed by *Firmicutes* (24.2%). As with the nasopharyngeal microbiota,  
304 none of the eight most relatively abundant phyla in the rumen microbiota differed between the two  
305 treatment groups. The most relatively abundant phylum present in the vaginal tract was *Firmicutes*  
306 (52%) followed by *Bacteroidota* (23.0%) and *Actinobacteriota* (17.4%). Similar to the rumen and  
307 nasopharyngeal microbiota, no difference between treatments was detected in the relative  
308 abundance of eight most relatively abundant phyla in the vaginal microbiota ( $p > 0.05$ ).

309 The 25 most relatively abundant genera in the nasopharyngeal, ruminal and vaginal  
310 microbiota are listed in Table 2. Overall, the predominant nasopharyngeal genera did not differ in  
311 their relative abundance between the LG and MG groups ( $p > 0.05$ ). In the rumen, the relative  
312 abundance of only one genus (*[Eubacterium] ruminantium* group) was significantly different  
313 between the two groups, being greater in the MG group than in the LG group ( $p = 0.029$ ). Within  
314 the vaginal microbial community, *Alistipes*, *Ruminococcus* and *Oscillospiraceae* NK4A214 group  
315 were significantly less relatively abundant in the LG group compared to the MG group ( $p < 0.05$ ).  
316 The relative abundance of *Romboutsia* ( $p = 0.061$ ) and *Paeniclostridium* ( $p = 0.092$ ) tended to be  
317 lower while *Arcanobacterium* ( $p = 0.090$ ) tended to be higher in MG group compared to LG group.

318 **Effect of Vitamin and Mineral Supplementation During the First Six Months of Gestation**  
319 **on the Maternal Microbiota**

320 To investigate whether VTM supplementation during the first 6 months of gestation affects  
321 the maternal microbiota, we compared the nasopharyngeal, ruminal and vaginal microbiota  
322 between the VTM and Control groups of replacement pregnant heifers. The community structure  
323 of the nasopharyngeal (PERMANOVA:  $R^2 = 0.038$ ,  $p > 0.05$ ), ruminal (PERMANOVA:  $R^2 =$   
324  $0.032$ ,  $p > 0.05$ ) and vaginal (PERMANOVA:  $R^2 = 0.049$ ,  $p > 0.05$ ) microbiota was not affected  
325 by VTM supplementation (Fig.2A). Microbial richness and diversity also did not differ by VTM  
326 supplementation in any of the three microbial communities ( $p > 0.05$ ) (Fig. 2B, C and D). At the  
327 phylum level, the relative abundance of the eight most relatively abundant phyla in the  
328 nasopharynx, rumen and vagina did not differ between the control and VTM groups (Fig. 3B).  
329 However, the relative abundance of several genera present in the nasopharynx (5 genera) and  
330 rumen (3 genera) was affected by VTM supplementation ( $p < 0.05$ , Table 3).

331 *Mycoplasma*, the third most relative abundant genera in the nasopharyngeal microbiota,  
332 was enriched in pregnant heifers receiving the VTM supplement (8.95% vs. 2.74%,  $p = 0.039$ ).  
333 VTM supplementation also resulted in a reduced relative abundance of *Oscillospiraceae* UCG-  
334 005, *Christensenellaceae R-7 group*, *Ruminococcus* and *Ornithinimicrobium* genera ( $p < 0.05$ ).  
335 Among the 26 most predominant ruminal genera, statistically significant difference in relative  
336 abundance was observed in only three genera (*Oscillospiraceae* NK4A214 group, *Butyrivibrio* and  
337 *Ruminococcaceae CAG-352*), and all of which were enriched in the VTM group ( $p < 0.05$ ). The  
338 relative abundance of the 27 relatively most abundant genera in the vaginal microbiota did not  
339 differ between the VTM and control groups ( $p > 0.05$ ) (Table 3).

340 **Holistic View of Nasopharyngeal, Ruminal and Vaginal Microbiota and Identification of**  
341 **Core Taxa Shared Across These Microbiomes**

342 To provide a holistic view of the microbiota residing within the respiratory,  
343 gastrointestinal, and reproductive tracts of each animal, we attempted to identify similarities  
344 among these microbial communities in virgin and pregnant heifers. To do this, the sequence data  
345 from all animal groups and treatments were combined and all samples were randomly subsampled  
346 to 6,200 sequences. As expected, each anatomical site had a distinct microbiota (Fig.4). In terms  
347 of microbial richness, the rumen had the richest microbiota followed by the vagina and  
348 nasopharynx in both virgin (Fig.1B) and pregnant heifers (Fig. 2B). Overall, the ruminal and  
349 vaginal microbiota were also more diverse than the nasopharyngeal microbiota in both groups of  
350 heifers (Fig. 1C and D and Fig. 2C and D).

351 Many taxa appeared to be highly specific to one of the three microbial habitats as shown  
352 in the heatmap (Fig. 5). For example, OTUs classified as *Prevotella*, *Papillibacter*,  
353 *Oscillospiraceae NK4A214* group and *Pseudobutyrvibrio* were more exclusively present in the  
354 rumen. While the most of the OTUs within the archaeal *Methanobrevibacter* genus were present  
355 in all three habitats, the rumen was most predominantly colonized by members of this genera.  
356 Some taxa, including *Mycoplasma*, *Filobacterium*, *Streptomyces*, *Nocardioides*, *Marmoricola*,  
357 *Arthrobacter* and *Cellulomonas spp.*, were associated with the nasopharynx. Certain  
358 *Corynebacterium* OTUs appeared to be specific to the vaginal microbiota.

359 Although the nasopharyngeal, ruminal and vaginal microbiota were clearly distinct, a small  
360 number of taxa were present in all three microbial communities. We identified 43 OTUs that were  
361 shared by more than 60% of all samples from the virgin yearling heifers (Table 4). From these  
362 OTUs, two were classified as *Methanobrevibacter* (OTU8 and OTU23). The remaining shared  
363 OTUs were bacterial in origin, with 17% and 80% of them belonging to the *Actinobacteria* and  
364 *Firmicutes* phyla, respectively. Of note, three bacterial OTUs [OTU25 (*Eubacterium*



365 *coprostanoligenes* group; OTU561(*Colidextribacter*) and OTU29 (*Ruminococcus*)] were shared  
366 by more than 90% of the samples. In pregnant heifers, 47 OTUs were present in more than 60%  
367 of all samples (Table 5), and most of them were identical to those taxa shared among the virgin  
368 yearling heifer samples. One taxon identified as *Romboutsia ilealis* (OTU11) was found in 100%  
369 of the samples, and OTU24 (*Paeniclostridium*), OTU25, OTU29 and OTU68 (*Bifidobacterium*  
370 *pseudolongum*) were identified in 95% of the samples.

371 As listed in Table 7, 41 OTUs were identified in 60% of all virgin yearling and pregnant  
372 heifer samples. Nine of these OTUs were also present in more than 80% of the samples. These  
373 included OTU23 (*Methanobrevibacter ruminantium*), OTU26 (*Corynebacterium*), three OTUs  
374 (OTU25, OTU62 and OTU1688) within the *Lachnospiraceae* NK3A20 group, two *Ruminococcus*  
375 OTUs (OTU29 and OTU83), OTU24 and OTU11. OTU68 was also found in 75% of the samples.  
376 Regardless of animal group and diet, these OTUs were shared by a high proportion of the  
377 nasopharyngeal, ruminal fluid, and vaginal samples, suggesting that these taxa may be so-called  
378 “core taxa” among these anatomical locations.

### 379 **Comparison of Methanogenic Archaeal Relative Abundance Between Virgin Yearling and** 380 **Pregnant Heifers, and Identification of Bacterial Genera Associated with** 381 ***Methanobrevibacter***

382 Methanogenic archaea, and in particular members of the *Methanobrevibacter* genus, have  
383 been reported to colonize the intestine of 84-day-old (Amat et al., unpublished), and 5- to 7-month-  
384 old calf fetuses (Guzman et al., 2020), as well as newborn calves (Guzman et al., 2015; Alipour et  
385 al., 2018). In addition, we identified here two *Methanobrevibacter* OTUs (OTU8 and OTU23) that  
386 were shared by a relatively high portion ( $\geq 65\%$ ) of all samples collected from both virgin yearling  
387 and pregnant heifers (Table 4). Therefore, we assessed whether the relative abundance of

388 *Methanobrevibacter* changed in response to pregnancy. For this, we compared the overall relative  
389 abundance of *Methanobrevibacter* spp. within each sample type between virgin yearling (non-  
390 pregnant) and pregnant heifers. Overall, the mean relative abundance of *Methanobrevibacter* in  
391 the nasopharynx, rumen fluid and vagina was 0.17%, 5.67%, and 0.47%, respectively (Fig.6A).  
392 The relative abundance of *Methanobrevibacter* in the rumen was greater in pregnant heifers  
393 compared to yearling heifers ( $p < 0.0001$ ), but similar in the other two microbial habitats ( $p > 0.05$ )  
394 (Fig. 6B and D).

395         There is increased research interest in the mitigation of enteric methane emissions from  
396 ruminant livestock via the manipulation of the rumen microbiota, primarily targeting commensal  
397 bacterial species involved in the supply or consumption of methanogenic substrates. Therefore, we  
398 assessed correlations between *Methanobrevibacter* and the other 24 most relatively abundant  
399 genera present in vaginal and ruminal microbiota of virgin yearling and pregnant heifers. Of note,  
400 the relative abundance of *Methanobrevibacter* in the nasopharynx was relatively low compared to  
401 the vagina and rumen and therefore, only genera in the vaginal and ruminal microbiota were  
402 included for this correlation analysis. The Spearman correlation analysis revealed that 15 out of  
403 these 24 genera in the rumen of virgin yearling heifers exhibited significant ( $p > 0.05$ ) correlations  
404 with *Methanobrevibacter*. Among which, the following 10 genera were positively correlated:  
405 *Christensenellaceae* R-7 group, *Ruminococcus*, *Oscillospiraceae* NK4A214 group, *Papillibacter*,  
406 *Pseudobutyrvibrio*, *Prevotellaceae* NK3B31 group, *Lachnospiraceae* NK3A20 group,  
407 *Lachnospiraceae* XPB1014 group, *Eubacterium hallii* group, *Butyrvibrio* and *Olsenella*.  
408 Whereas genera within the *Prevotellaceae* family (*Prevotella*, *Prevotellaceae* UCG-003 and  
409 *Prevotellaceae* UCG-001) and *Anaeroplasma* were strongly and inversely associated with  
410 *Methanobrevibacter* (Fig.7A). Varying degrees of positive or negative associations among the

411 *Methanobrevibacter*-associated 15 genera and between other genera were also identified (Fig.7A).  
412 Within the vaginal microbial community of virgin yearling heifers, there were only three genera  
413 (*Monoglobus*, *Akkermansia* and *Rikenellaceae* dgA-11 gut group) that displayed significant  
414 correlations with *Methanobrevibacter* ( $p < 0.05$ ) and these were positive correlations (Fig. 7B).

415 In pregnant heifers, there were similar correlation patterns between *Methanobrevibacter*  
416 and other ruminal genera in the yearling heifers, with 14 genera significantly ( $P < 0.05$ ) and  
417 positively ( $n = 8$ ) or negatively ( $n = 6$ ) correlated with this genus (Fig. 8A). In contrast to the  
418 vaginal tract of virgin yearling heifers, there were 10 genera in the vaginal microbiota of pregnant  
419 heifers that were significantly associated with *Methanobrevibacter*, nine of them positively  
420 correlated. Interestingly, although *Prevotella* and *Prevotellaceae* UCG-003 were inversely  
421 correlated with *Methanobrevibacter* in the rumen of both virgin yearling and pregnant heifers, they  
422 were strongly and positively correlated with this genus in the vagina microbiota. Only the inverse  
423 correlations between *Methanobrevibacter* and *Corynebacterium* were significant ( $p < 0.05$ ) (Fig.  
424 8B).

425 Next, we applied a stepwise-selected generalized linear mixed model to further identify  
426 genera that have a significant effect on the relative abundance of *Methanobrevibacter* spp. in the  
427 rumen and vagina. In the virgin yearling heifers, *Prevotella* and the *Christensenellaceae* R-7  
428 group were predicted to have a significant effect ( $p < .0001$ ) on *Methanobrevibacter*  
429 [ $1/(Methanobrevibacter^{\wedge 2}) = 0.02956 + (0.002514 \times Prevotella) + (-0.00875 \times$   
430 *Christensenellaceae* R-7 group)]. As for pregnant heifers, *Methanobrevibacter* abundance was  
431 predicted to be negatively affected by *Prevotellaceae* UCG 003 ( $p = 0.037$ ), and positively by  
432 *Christensenellaceae* R-7 group ( $p = 0.0326$ ) [ $1/(Methanobrevibacter^{\wedge 2}) = 0.03793 + (-0.00602 \times$   
433 *Christensenellaceae* R-7 group) + (0.007088  $\times$  *Prevotellaceae* UCG-003)]. Within the vaginal

434 microbial community of pregnant heifers, *Ruminococcus* ( $p = 0.0098$ ), *Prevotellaceae* UCG-003  
435 ( $p = 0.0005$ ) and *Prevotella* ( $p < .0001$ ) were predicted to have a significant negative effect on  
436 *Methanobrevibacter* [ $1/(Methanobrevibacter^{A2}) = -0.3780 + (0.1501 \times Ruminococcus) + (0.2875$   
437  $\times Prevotella$  UCG-003) +  $(0.2898 \times Prevotella)$ ]. Among the 24 most relatively abundant genera  
438 in the vaginal microbiota of yearling heifers, only *Oscillospiraceae* UCG-005 ( $p = 0.0138$ ) was  
439 predicted to have a negative impact on *Methanobrevibacter* [ $1/(Methanobrevibacter^{A2}) = 0.05975$   
440  $+ (0.04037 \times Oscillospiraceae$  UCG-005).

## 441 **DISCUSSION**

442 New evidence from our laboratory (Amat et al., unpublished data) and Guzman and  
443 colleagues (Guzman et al., 2020) indicate that microbial colonization of the calf gastrointestinal  
444 tract may take place before birth. These observations suggest that the maternal microbiome may  
445 have a role in shaping the development of the offspring microbiome in cattle. In addition, it is  
446 believed that undesirable alterations of the maternal microbiota may indirectly influence fetal  
447 development, and that these effects may be transmitted to progeny, resulting in a dysbiotic  
448 microbiota (Calatayud et al., 2019) and increased offspring susceptibility to the development of  
449 metabolic disorders and respiratory infections (Calatayud et al., 2019; Yao et al., 2020). Recent  
450 evidence from mouse studies has demonstrated that the maternal microbiota during pregnancy  
451 modulates the programming of fetal metabolic and nervous system development (Kimura et al.,  
452 2020; Vuong et al., 2020).

453 Although the role of maternal nutrition in developmental programming in cattle has been  
454 relatively well appreciated (McLean et al., 2017; Caton et al., 2019; Crouse et al., 2019; Menezes  
455 et al., 2021), the potential involvement of the maternal microbiota in fetal programming and  
456 offspring microbiome development remains largely unexplored. Considering the current evidence,

457 it is important to explore whether bovine maternal nutrition/microbiome during pregnancy  
458 influences feto-maternal crosstalk, subsequently influencing offspring microbiome development.  
459 Maternal vitamin and mineral supplementation before calving has been well documented to be  
460 associated with improved fetal programming and offspring health and productivity in cattle (Mee  
461 et al., 1995; Wilde, 2006; Van Emon et al., 2020; Diniz et al., 2021; Menezes et al., 2021).  
462 However, whether VTM supplementation-associated positive outcomes observed pre- and post-  
463 calving are dependent on alterations in the ruminal microbiota remains unexplored. In the present  
464 study, we evaluated whether differences in maternal weight gain during the first trimester of  
465 gestation affected the postnatal nasopharyngeal, ruminal, and vagina microbial communities of  
466 virgin heifers at 9 months of age. We also characterized and compared these three microbiota in  
467 pregnant heifers to evaluate the impact of VTM supplementation during the first six month of  
468 gestation on the maternal microbiome. Finally, we identified core taxa that are shared within the  
469 respiratory, gastrointestinal, and reproductive tract microbiota of cattle.

470  
471 **Effect of Maternal Restricted Gain During the First Trimester of Gestation on Offspring**  
472 **Microbiota Development**

473 The virgin yearling heifers born from the dams that were subjected to LG (0.29 kg/d) during  
474 the first 84 days of gestation harbored a similar nasopharyngeal, ruminal and vaginal microbiota  
475 to those born from MG (0.79 kg/d) dams. The LG dams had a reduced average daily gain  
476 ( $p < 0.01$ ) were 40 kg lighter than MG dams at calving ( $p < 0.01$ ), and their calves had a lower  
477 birth weight than those from MG dams (28.6 vs. 30.8 kg,  $p = 0.03$ ) (Baumgaertner, 2020). As  
478 previously reported, fetuses harvested from a subset of the LG and MG dams at 84 days of  
479 gestation exhibited distinct fetal metabolic programming (Menezes et al., 2021), including altered  
480 amino acid profiles in the fetal fluids (Menezes et al., 2021). In addition, we identified the presence

481 of an archaeal and bacterial microbiota in intestinal and fluid samples from these 84-day-old calf  
482 fetuses (Amat et al., unpublished data). Therefore, we hypothesized that the divergent microbiome  
483 may be detected in virgin heifers that were exposed to divergent in utero nutrition (i.e. LG or MG)  
484 during their first trimester of gestation. However, no significant effect of maternal nutrition was  
485 found on the microbial community structure in the offspring nasopharynx, rumen, or vagina. There  
486 may be many reasons for this finding, including the timing of sample collection. For example,  
487 samples were collected when the offspring heifers were at 9 months of age, which was about 15  
488 months after fetal exposure to the restrictive maternal diets. This may simply be too late in their  
489 development to detect microbial community alterations in the offspring as a result of maternal  
490 nutrition. Therefore, future studies investigating the impact of maternal nutrient and microbiome  
491 on offspring microbiome development should include a more robust profile of early life  
492 microbiome measurements.

#### 493 **Effect of Vitamin and Mineral Supplementation During the First 6 Months of Gestation on** 494 **Maternal Microbiota**

495 VTM supplementation during the first 6 months of gestation did not induce significant  
496 alterations in community structure and diversity of the nasopharyngeal, rumen or vaginal  
497 microbiota. While there is limited information on the effect of mineral and vitamin  
498 supplementation on the gut microbiota of ruminant animals, the impact of dietary mineral and  
499 vitamin intake on potentially beneficial or pathogenic gut microbes in humans and rodent animals  
500 have been relatively well documented (Yang et al., 2020). For example, calcium and phosphorus  
501 supplementation increased the relative abundance of *Clostridium*, *Ruminococcus* and  
502 *Lactobacillus* spp. while reducing *Bifidobacterium* spp. in healthy men or mice (Nadeem Aslam  
503 et al., 2016; Trautvetter et al., 2018; Li et al., 2019). The impact of dietary supplementation with

504 selenium, magnesium, iron or zinc on certain gut commensal or pathogenic microbes was also  
505 reported in children and mice (Yang et al., 2020). Of note, a significant effect of mineral  
506 supplementation on the gut microbiota was observed but only at the microbial taxa level and not  
507 on the microbial community structure and diversity (Yang et al., 2020).

508         The results from a limited number of studies performed on cattle also indicate that mineral  
509 supplementation may influence ruminal microbiota composition. Clay mineral supplementation  
510 increased the relative abundance of *Butyrivibrio* while reducing the relative abundance of  
511 *Lactobacillus*, *Fusobacterium*, and *Treponema* genera in the rumen of non-lactating Holstein cows  
512 (Neubauer et al., 2019); however, it did not alter the rumen microbial community structure or  
513 diversity. Similarly, we observed that VTM supplementation increased the relative abundance of  
514 *Butyrivibrio* in the rumen ( $p < 0.05$ ). *Butyrivibrio* spp. are considered commensal members of the  
515 rumen microbiota, producing butyrate through degradation of otherwise indigestible plant  
516 polysaccharides (Kelly et al., 2010). The *Oscillospiraceae* NK4A214 group and  
517 *Succinivibrionaceae* CAG-352 were the only other ruminal genera that responded to VTM  
518 supplementation in the present study. These are uncultured taxa and their role in the rumen is  
519 largely unknown. In contrast to our findings and those of Neubauer et al. (2019), Liu and others  
520 (2017) observed noticeable alterations in microbial richness and diversity of ruminal microbiota  
521 in both lactating Holstein cows (3-4 years old) and yearling heifers (10-months old) in response to  
522 feeding mineral salt bricks containing Mg, Co, Cu, Fe, Mn, Se, Zn, I and Na for one month.

523         Compared to the rumen microbiota, the effect of mineral supplementation on the bovine  
524 respiratory and reproductive microbiota has been less characterized. Feeding beef calves with  
525 selenium-biofortified alfalfa hay has been reported to alter the nasopharyngeal microbiota (Hall et  
526 al., 2017; Hall et al., 2020). In the present study, although no significant changes were detected in

527 the microbial community structure and diversity in the nasopharynx following VTM  
528 supplementation, changes were detected in relative abundance of five relatively abundant genera  
529 (*Mycoplasma*, *Oscillospiraceae* UCG-005, *Christensenellaceae* R-7 group, *Ruminococcus* and  
530 *Ornithinimicrobium*). Among these genera, *Mycoplasma*, which includes a bovine respiratory  
531 disease (BRD)-associated pathogen, *Mycoplasma bovis*, was enriched in pregnant heifers that  
532 receiving VTM supplementation. BRD is not a significant health concern among adult and  
533 pregnant cattle but it is the number one health problem affecting newly weaning calves arriving in  
534 the feedlot (Johnson and Pendell, 2017). The positive association between VTM supplementation  
535 and nasopharyngeal *Mycoplasma* observed here poses the question of whether maternal VTM  
536 supplementation influences colonization of the offspring respiratory tract by *Mycoplasma* spp. No  
537 information has been reported regarding the impact of mineral supplementation on reproductive  
538 microbiota in cattle.

539 Vitamins A, D<sub>3</sub> and E were included in the VTM supplement given to the pregnant heifers.  
540 Thus, it is impossible to discern whether the subtle changes observed at the taxa level in both the  
541 nasopharyngeal and ruminal microbiota are due to the minerals and vitamins supplemented.  
542 Evidence from human, rodent and pig studies suggest that the gut microbiota responds to vitamin  
543 supplementation (Yang et al., 2020). Gastrointestinal-associated *Bifidobacterium* (vitamin A, C)  
544 *Akkermansia* (vitamin A), and *Lactobacillus* spp. (vitamin C) were more relatively abundant while  
545 *E. coli* (vitamin C) and *Clostridium* (vitamin D) spp. decreased in relative abundance after vitamin  
546 supplementation (Xu et al., 2014; Talsness et al., 2017; Huda et al., 2019; Yang et al., 2020). Our  
547 results indicate that vitamin supplementation has less impact on the ruminal microbiota. Overall,  
548 VTM supplementation for first 6 months of gestation did not affect the maternal microbiota. There  
549 could be due to several factors. Considering that mineral salt intake was reported to alter the



550 ruminal microbiota in 3-4-year-old lactating cows (Liu et al., 2017), the resilience and robust of  
551 the mature ruminal microbiota can likely be ruled out as a reason for the absence of any VTM  
552 effect on the ruminal microbiota in pregnant heifers (1 year 9 months-old).

553         Pregnancy status rather than age, however, could be associated with the non-  
554 responsiveness of the ruminal microbiota to VTM supplementation. In rodent studies, the maternal  
555 gut microbiota undergoes profound changes over the course of pregnancy (Collado et al., 2008;  
556 Koren et al., 2012; Nuriel-Ohayon et al., 2016; Smid et al., 2018). As pregnancy progresses from  
557 the 1st to 3rd trimester, the maternal gut microbiota becomes less diverse (Koren et al., 2012) but  
558 with a higher microbial density, which may result in a microbiota that is more robust and resilient  
559 to perturbations. Hence, future studies are warranted to investigate the impact of VTM  
560 supplementation and other dietary interventions on the maternal microbiota of cattle using a non-  
561 pregnant control cohort.

### 562 **Holistic View of Microbial Communities Across Respiratory, Gastrointestinal and** 563 **Reproductive Tract and the Core Taxa Shared Across These Habitats**

564         As expected, the overall microbial structure, diversity and composition were noticeably  
565 different among the nasopharyngeal, ruminal and vaginal microbiota in both virgin yearling and  
566 pregnant heifers. The ruminal microbiota was dominated by the anaerobic phylum *Bacteroidota*  
567 (66%), while the nasopharyngeal and vaginal microbiota the majority of 16S rRNA gene  
568 sequences were classified as *Actinobacteriota* (51%) and *Firmicutes* (52%), respectively. Various  
569 factors including niche-specific physiological factors (temperature, pH, oxygen and nutrient  
570 availability), dietary, and environmental factors are involved in shaping the microbiota of the  
571 bovine respiratory tract (Zeineldin et al., 2019; Timsit et al., 2020), rumen (O'Hara et al., 2020;  
572 Cholewińska et al., 2021) and reproductive tract (Galvão et al., 2019). Subtle physiological and

573 anatomical differences in the mucosal surfaces of the bovine respiratory tract have been shown to  
574 significantly influence the microbial distribution along the respiratory tract (McMullen et al.,  
575 2020).

576 In the present study, although the nasopharynx, rumen and vagina have drastically  
577 different physiological and anatomical properties, we identified 41 OTUs that were shared by a  
578 high portion (60%) of all samples from both virgin yearling and pregnant heifers. This indicates  
579 that these core taxa can colonize and inhabit the respiratory, gastrointestinal and reproductive tracts  
580 regardless of the drastic differences in physiological conditions in these locations. The majority  
581 (80%) of these core taxa are members of the *Firmicutes*, which is one of the most ubiquitous and  
582 relatively abundant bacterial phyla in the respiratory, gastrointestinal and reproductive tract-  
583 (vagina, uterus) (Galvão et al., 2019), mammary gland- (Derakhshani et al., 2018), ocular-  
584 (Bartenslager et al., 2021) and hoof- (Zinicola et al., 2015) -associated microbiota in cattle,  
585 demonstrating the adaptability of members of this phylum. Nine taxa within the *Actinobacteria*  
586 phylum including *Bifidobacterium pseudolongum* and several *Corynebacterium* spp. were among  
587 these core taxa. *B. pseudolongum* is widely found in the mammalian gut (Lugli et al., 2019) and  
588 has long been noted for its probiotic properties in human, cattle and pigs (Abe et al., 1995; Kissels  
589 et al., 2017). Given the known beneficial effects of this species on the host, and as a core taxon  
590 present in the respiratory, gut and reproductive tracts of cattle, *B. pseudolongum* may have the  
591 potential to enhance cattle health and productivity, as may some of the other core taxa identified  
592 in this study. Species and strain level resolution of these core taxa using shotgun metagenomic  
593 sequencing and characterization of their functional features using culturing should be the focus of  
594 future studies.

595 Two *Methanobrevibacter* OTUs were also identified among the core taxa. Although  
596 members of this methanogenic genus are well known for their involvement in ruminal methane  
597 production (Hook et al., 2010; Danielsson et al., 2017; Greening et al., 2019), and are frequently  
598 observed in the vaginal microbiota (Laguardia-Nascimento et al., 2015) in cattle, it is interesting  
599 to note that this genus is also found in the bovine respiratory tract. The presence of these  
600 *Methanobrevibacter* OTUs within the respiratory, gastrointestinal, and reproductive tracts has  
601 important implications for the identification of maternal seeding of the calf microbiota with  
602 pioneer methanogens before and during birth. *Methanobrevibacter* spp. are predominant in 5- to  
603 7-month-old calf fetuses (Guzman et al., 2020) as well as newborn calves (Guzman et al., 2015;  
604 Alipour et al., 2018). Our results indicate that the respiratory microbiota may also seed the calf  
605 gastrointestinal tract with *Methanobrevibacter* spp. perinatally. This highlights the necessity of  
606 holistic assessment of respiratory, gastrointestinal and reproductive tract microbiota to trace the  
607 origin of pioneer calf microbiota. To our best of knowledge, this is the first study to evaluate  
608 nasopharyngeal, ruminal and vaginal microbiota in an individual ruminant animal, and to identify  
609 the core taxa shared amongst these microbial ecologies.

610 **Ruminal *Methanobrevibacter* Enriched in Pregnant Heifers and Associations of**  
611 ***Methanobrevibacter* with Predominant Ruminal and Vaginal Bacterial Genera**

612 Given that lowering methane emissions in cattle benefits both environment and cattle  
613 production (Beauchemin et al., 2020), and increasing evidence suggesting that the ruminal  
614 microbiome and host genetics can be targeted independently to improve feed efficiency and  
615 mitigate enteric methane emissions from cattle (Difford et al., 2018; Li et al., 2019), we therefore  
616 focused on this methanogenic archaeal genus, *Methanobrevibacter*. We identified that pregnant  
617 heifers harbored a greater relative abundance of ruminal *Methanobrevibacter* compared to non-

618 pregnant virgin yearling heifers. Confounding factors associated with dietary (11 % more hay fed  
619 to virgin heifers than pregnant heifers) and age differences makes it difficult to associate pregnancy  
620 with the colonization of the rumen with methanogenic archaea. However, the impact of pregnancy  
621 and mitigation of maternal ruminal methanogens on offspring enteric methane emissions warrants  
622 further investigation.

623 Our correlation analysis revealed that in comparison to vaginal *Methanobrevibacter*, the  
624 relative abundance of ruminal *Methanobrevibacter* is highly influenced by many other commensal  
625 genera in the rumen. For example, in the rumen microbiota many genera within the *Prevotellaceae*  
626 family were inversely associated with the relative abundance of *Methanobrevibacter*.  
627 Interestingly, the opposite was found in the vaginal microbiota, suggesting that the nature of the  
628 interaction between *Methanobrevibacter* and *Prevotella* and *Prevotellaceae* UCG-003 may be  
629 niche specific and that *Prevotella* spp. in the rumen may become pro-methanogenic if they present  
630 in reproductive microbial ecosystem.

631 The stepwise-selected GLM model identified *Prevotella* and *Prevotellaceae* UCG-003 as  
632 having a significant and negative effect on the relative abundance of *Methanobrevibacter* in rumen  
633 of both virgin and pregnant heifers and vaginal tract of pregnant heifers. This is in agreement with  
634 previous studies reporting that microbial communities with highly-abundant lactate-consuming  
635 bacteria (*Prevotella bryantii*) and high H<sub>2</sub>-consuming (e.g. certain *Prevotella* spp.) has been  
636 associated with lower ruminal methane production (Denman et al., 2015; Danielsson et al., 2017;  
637 Tapio et al., 2017; Granja-Salcedo et al., 2019). Thus, members of the *Prevotella* and  
638 *Prevotellaceae* UCG-003 in the bovine rumen and vagina may have anti-methanogenic potential  
639 to mitigate methane emissions in cattle. The *Christensenellaceae* R-7 group was identified as the  
640 genus that can have significant positive effect on *Methanobrevibacter* in the present study. This

641 may suggest that some species within this genus may be involved in producing methanogenic  
642 substrates such as H<sub>2</sub> and acetate. Future *in vitro* studies are needed to confirm the anti-  
643 methanogenic properties of *Prevotella* and *Prevotellaceae* UCG-003 and pro-methanogenic  
644 activity of *Christensenellaceae* R-7 group spp. originating from the rumen of cattle.

645 In conclusion, no noticeable difference was observed in  $\alpha$  and  $\beta$ -diversity in any of the  
646 nasopharyngeal, ruminal and vaginal microbiota between virgin heifers raised from dams exposed  
647 to divergent rates of gain during the first trimester of pregnancy, or between pregnant heifers  
648 consuming control and VTM diets. Only in the vaginal microbiota were there relatively abundant  
649 genera that were affected by maternal rate of gain during early gestation. Maternal VTM  
650 supplementation resulted in subtle compositional alterations in the nasopharyngeal and ruminal  
651 microbiota. A total of 41 archaeal and bacterial OTUs were shared by over 60% of all samples  
652 from both virgin and pregnant heifers. Two taxa within the *Methanobrevibacter* genus were  
653 among these taxa this genus was more relatively abundant in pregnant compared to virgin heifers.  
654 Compared to the vaginal *Methanobrevibacter*, *Methanobrevibacter* in the rumen was predicted to  
655 be highly interactive with other commensal members.

656 Among the 25 most relatively abundant genera, *Prevotella* and *Prevotella* UCG-003  
657 (negative) and *Christensenellaceae* R-7 group (positive) were predicted to have a significant effect  
658 on the relative abundance of ruminal *Methanobrevibacter* spp. Overall, the results of this study  
659 suggest that there is little impact of maternal gestational nutrition during the first trimester on the  
660 calf microbiota assessed at 9 months of age, and that VTM supplementation during pregnancy may  
661 not alter the maternal microbiota. This study provides evidence that there are several microbial  
662 taxa, including methanogenic archaea, that are shared across the respiratory, gastrointestinal, and  
663 reproductive tracts. Therefore, this suggests that there is a need for a holistic evaluation of the

664 bovine microbiota when considering potential maternal sources for seeding calves with pioneer  
665 microbiota, and when targeting the maternal microbiome to enhance offspring health and  
666 development.

667

## 668 **DATA AVAILABILITY**

669 The datasets generated for this study can be found in the Sequences that were submitted to  
670 the NCBI sequence read archive under BioProject accession PRJNA721423.

671

## 672 **ETHICS STATEMENT**

673 All animals used in this study were cared for in accordance with the guidelines set by the  
674 Olfert et al. (1993) and all experimental procedures involving cattle were approved by the North  
675 Dakota State University Institutional Animal Care and Use Committee (#A20085 and A20047).

676

## 677 **AUTHOR CONTRIBUTIONS**

678 Conceiving the idea, designing the study, and providing supervision—S.A. and C.R.D.;  
679 Cattle management— A.C.B.M., F.B., C.R.D. and K.K.S.; Animal care and sample collections—  
680 S.A., C.R.D. K.S., A.C.B.M., T.W., J. D. K., F.B.; Sample processing—K.S. and S.A.;  
681 Bioinformatics analysis— D.B.H., T.L. and S.A.; Data processing and statistical analysis—T.D.S.,  
682 D.B.H, and S.A.; Manuscript writing—S.A.; Manuscript review and editing—S.A., D.B.H.,  
683 A.C.B.M and C.R.D. All authors have read and agreed to the published version of the manuscript.

684

685

686

687 **FUNDING**

688           The work presented in this study was financially supported by the North Dakota Ag  
689 Experiment Station as part of a start-up package for S.A. Animal management portion of this  
690 project was supported by the North Dakota Corn Council, the Central Grasslands Research and  
691 Extension Center, and the ND Ag Experiment Station.

692 **ACKNOWLEDGMENTS**

693           The authors acknowledge the support from the staff at NDSU Beef Cattle Research  
694 Complex.

695

696

697

698

699

700

701

702

703

704

705

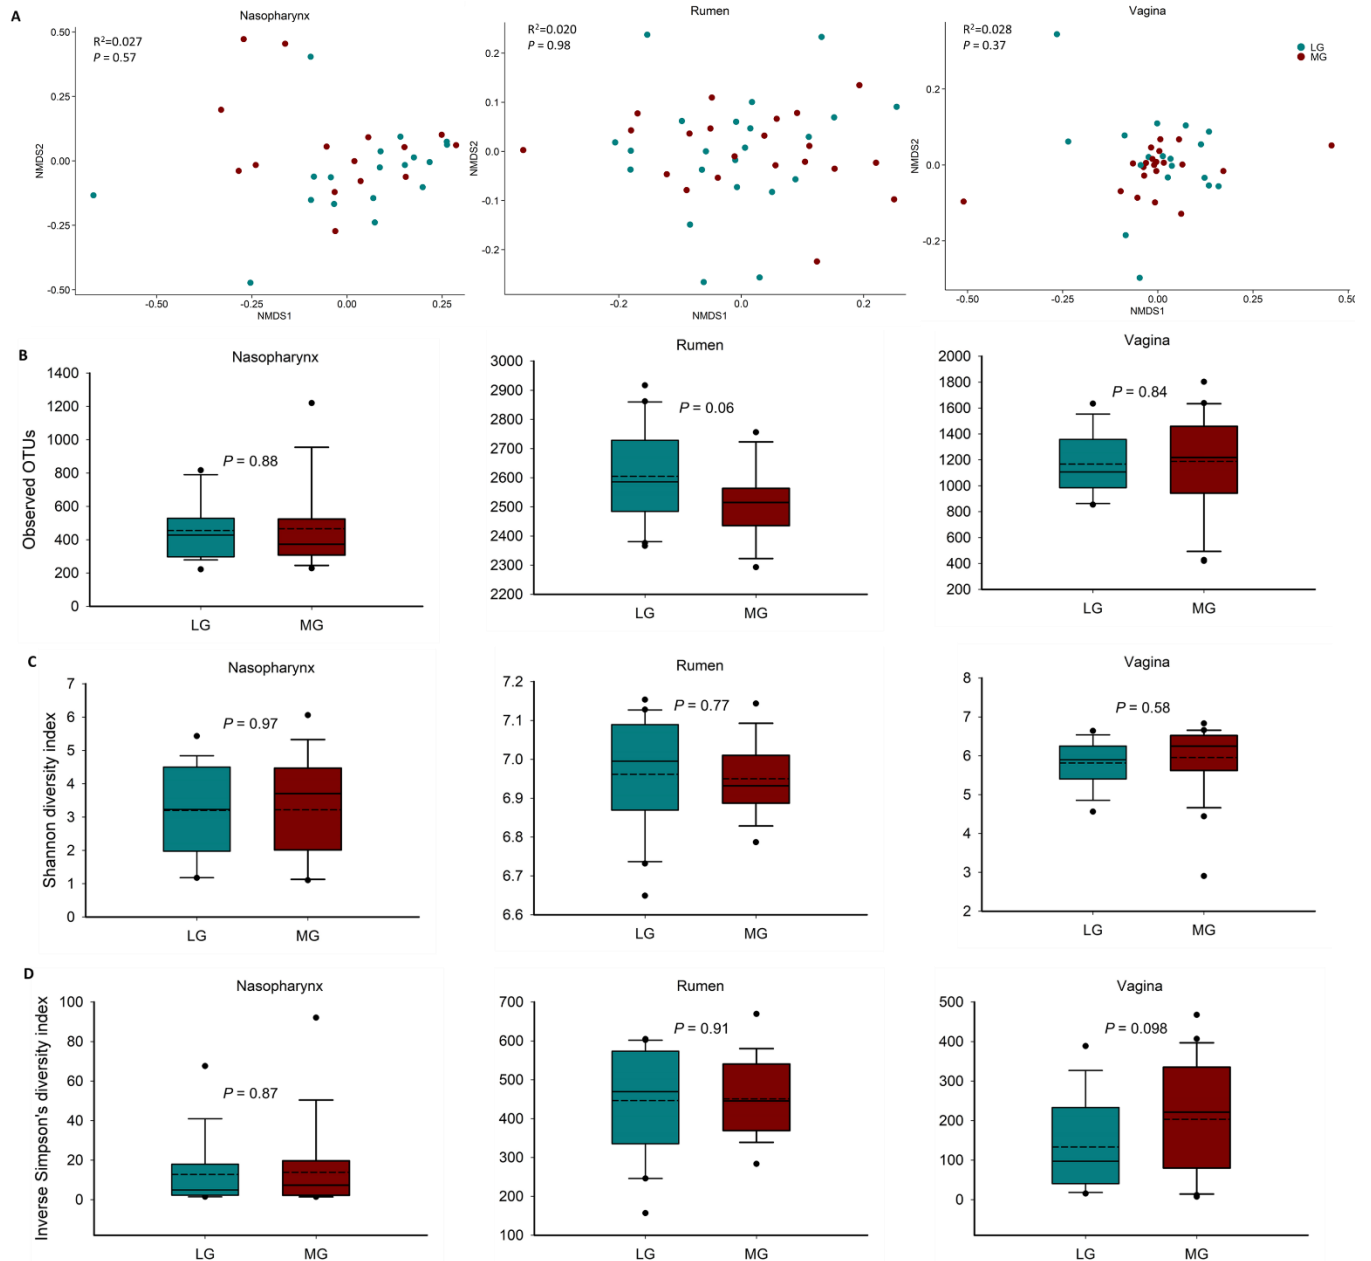

706

707 **Figure 1.** Beta and alpha diversity of the nasopharyngeal, ruminal and vaginal microbiota of virgin  
708 yearling heifers from low gain (LG) or medium gain (MG) dams as determined during the first  
709 trimester of gestation. (A) Non-metric multidimensional scaling (NMSD) plots of the Bray-Curtis  
710 dissimilarities, (B) number of operational taxonomic units (OTUs), and Shannon (C) and inverse  
711 Simpson's diversity index (D) of each microbial community.

712

713



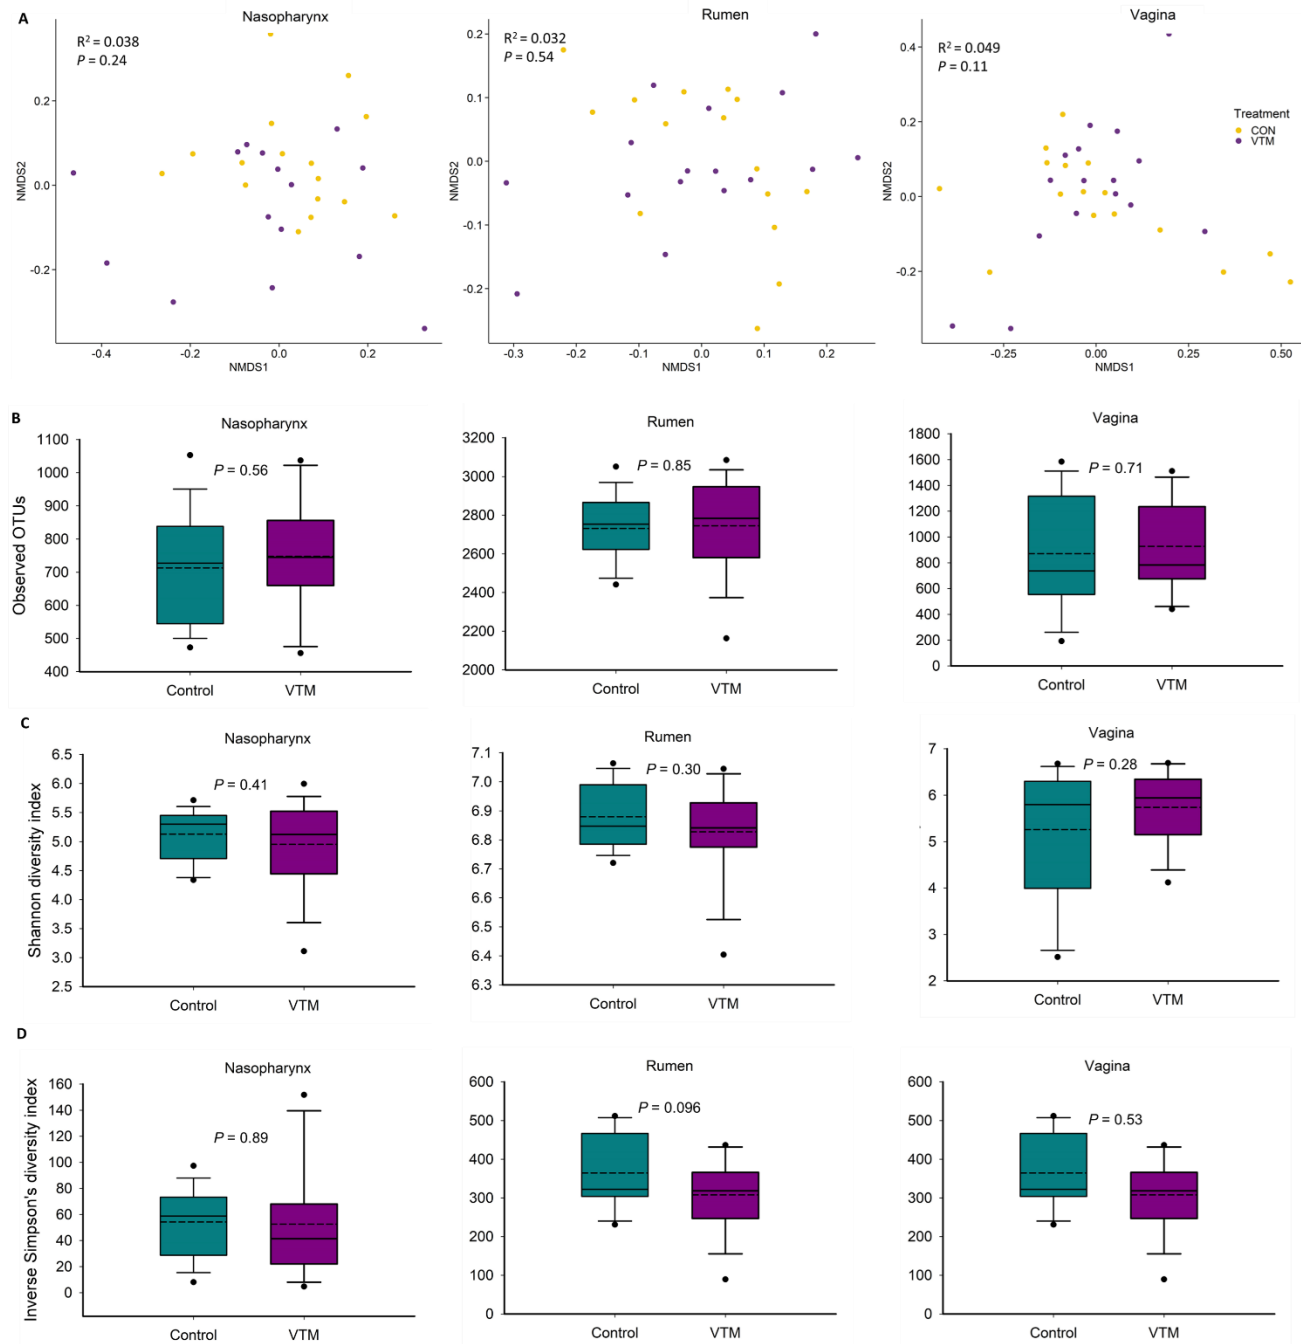

714  
715

716 **Figure 2.** Beta and alpha diversity of the nasopharyngeal, ruminal and vaginal microbiota of  
717 pregnant heifers that received a vitamin and mineral supplement (VTM) or a control diet (Control)  
718 during the first six months of gestation. **A**) Non-metric multidimensional scaling (NMDS) plots  
719 of the Bray-Curtis dissimilarities, **B**) number of operational taxonomic units (OTUs), and Shannon  
720 **(C)** and inverse Simpson's diversity index **(D)** of each microbial community.

721

722

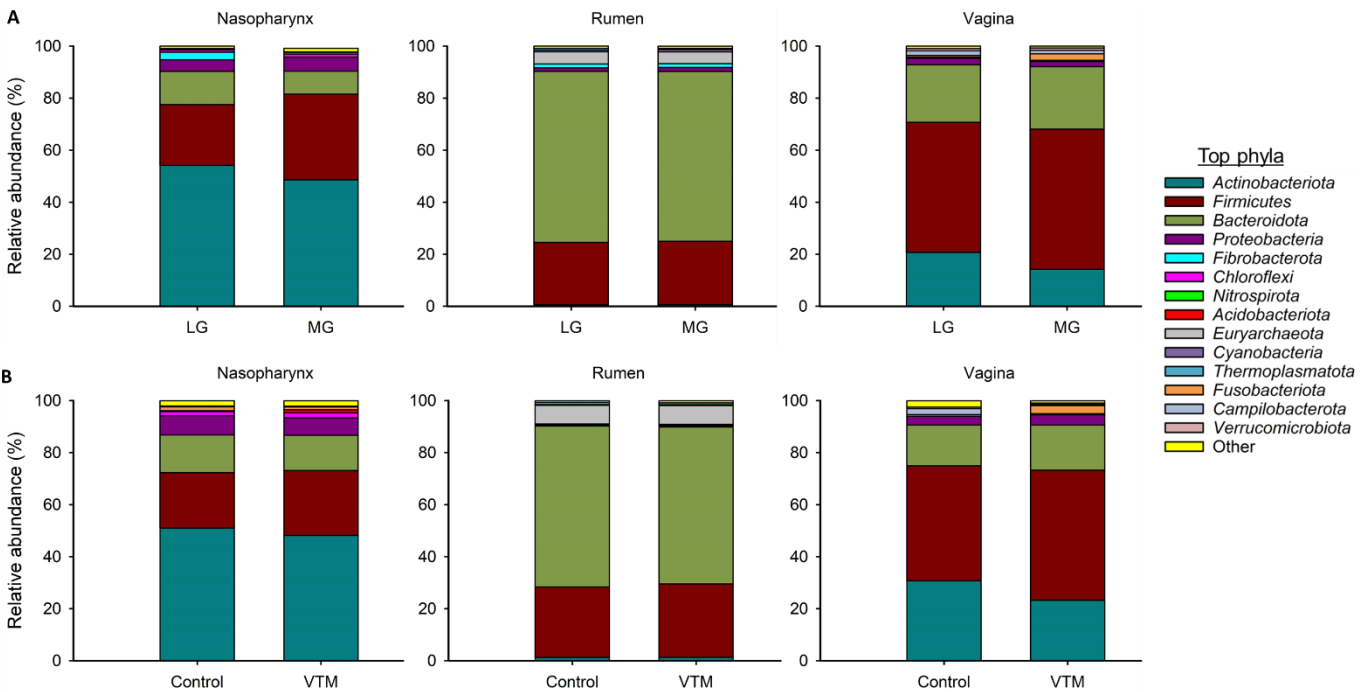

723

724

725

726

727

728

729

730

731

732

733

734

735

736

737

738

739

740

741

742

743

744

745

746

**Figure 3.** Percent relative abundance of the eight most relatively abundant phyla in the nasopharyngeal, ruminal and vaginal microbiota of (A) virgin yearling heifers from low gain (LG) or medium gain (MG) dams and (B) pregnant heifers that received a vitamin and mineral supplement (VTM) or a control diet (Control) during the first 6 months of gestation

747  
748

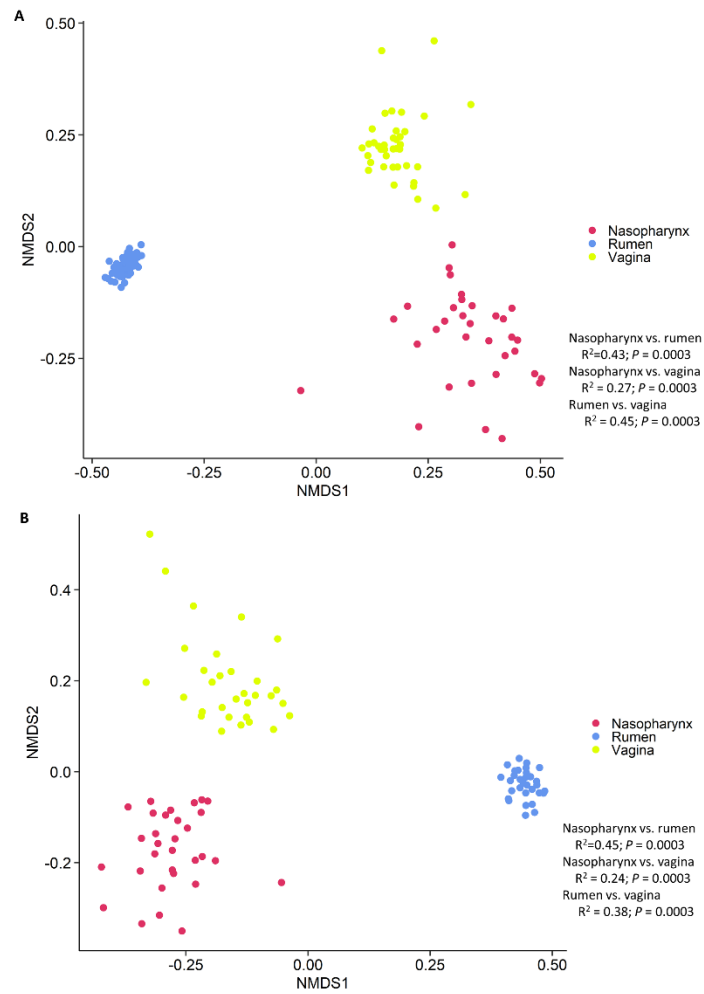

749  
750  
751  
752  
753  
754  
755  
756  
757  
758  
759  
760  
761  
762  
763  
764  
765  
766

**Figure 4.** Non-metric multidimensional scaling (NMDS) plots of the Bray-Curtis dissimilarities of the nasopharyngeal, ruminal and vaginal microbiota of (A) virgin yearling and (B) pregnant heifers.

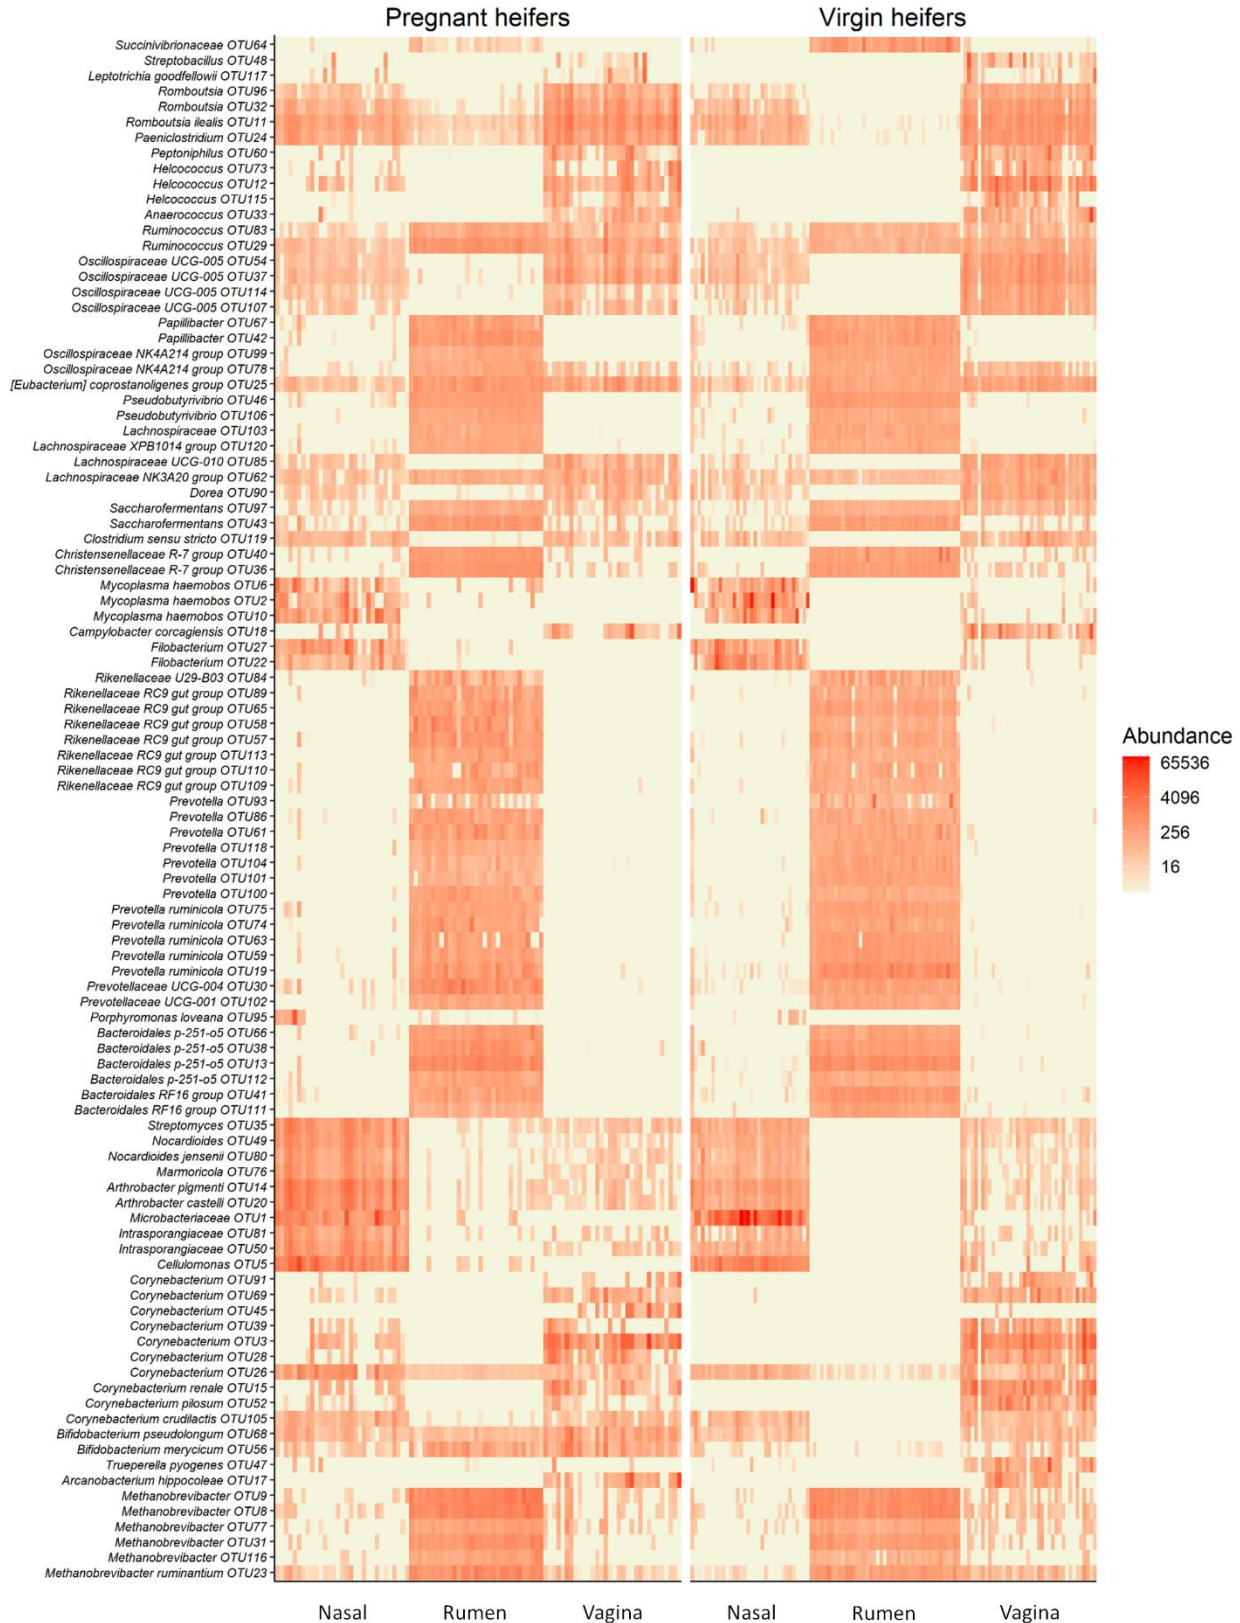

767  
768  
769

**Figure 5.** Heat map showing the 100 most abundant OTUs ( $\log_4$ ) overall by sample type within each animal group (Pregnant and virgin heifers).

770  
771  
772

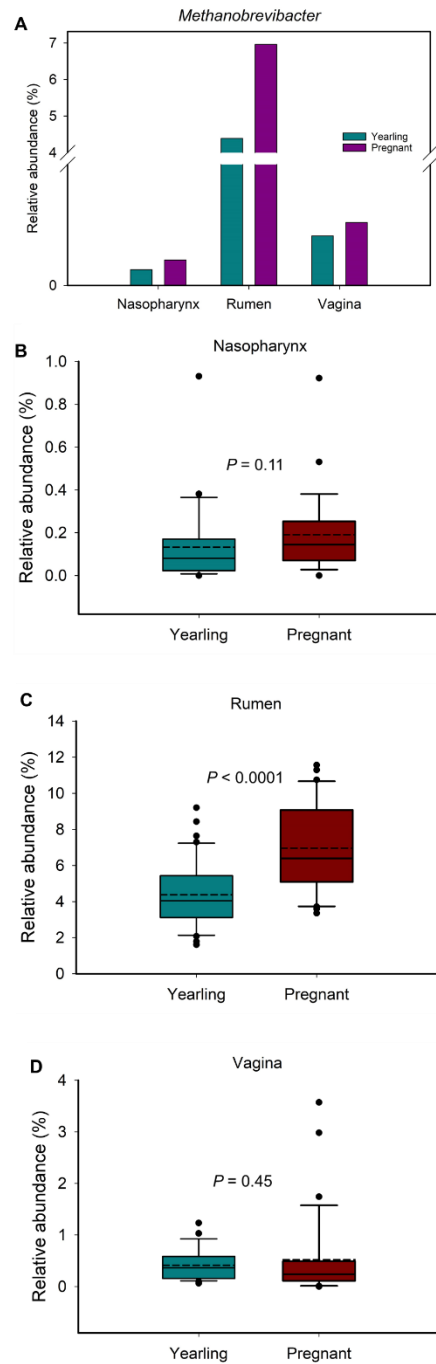

773  
774  
775  
776  
777  
778  
779

**Figure 6.** Overall relative abundance of *Methanobrevibacter* in nasopharyngeal, ruminal and vaginal microbiota by sample types (A) and by animal groups (B, C and D).



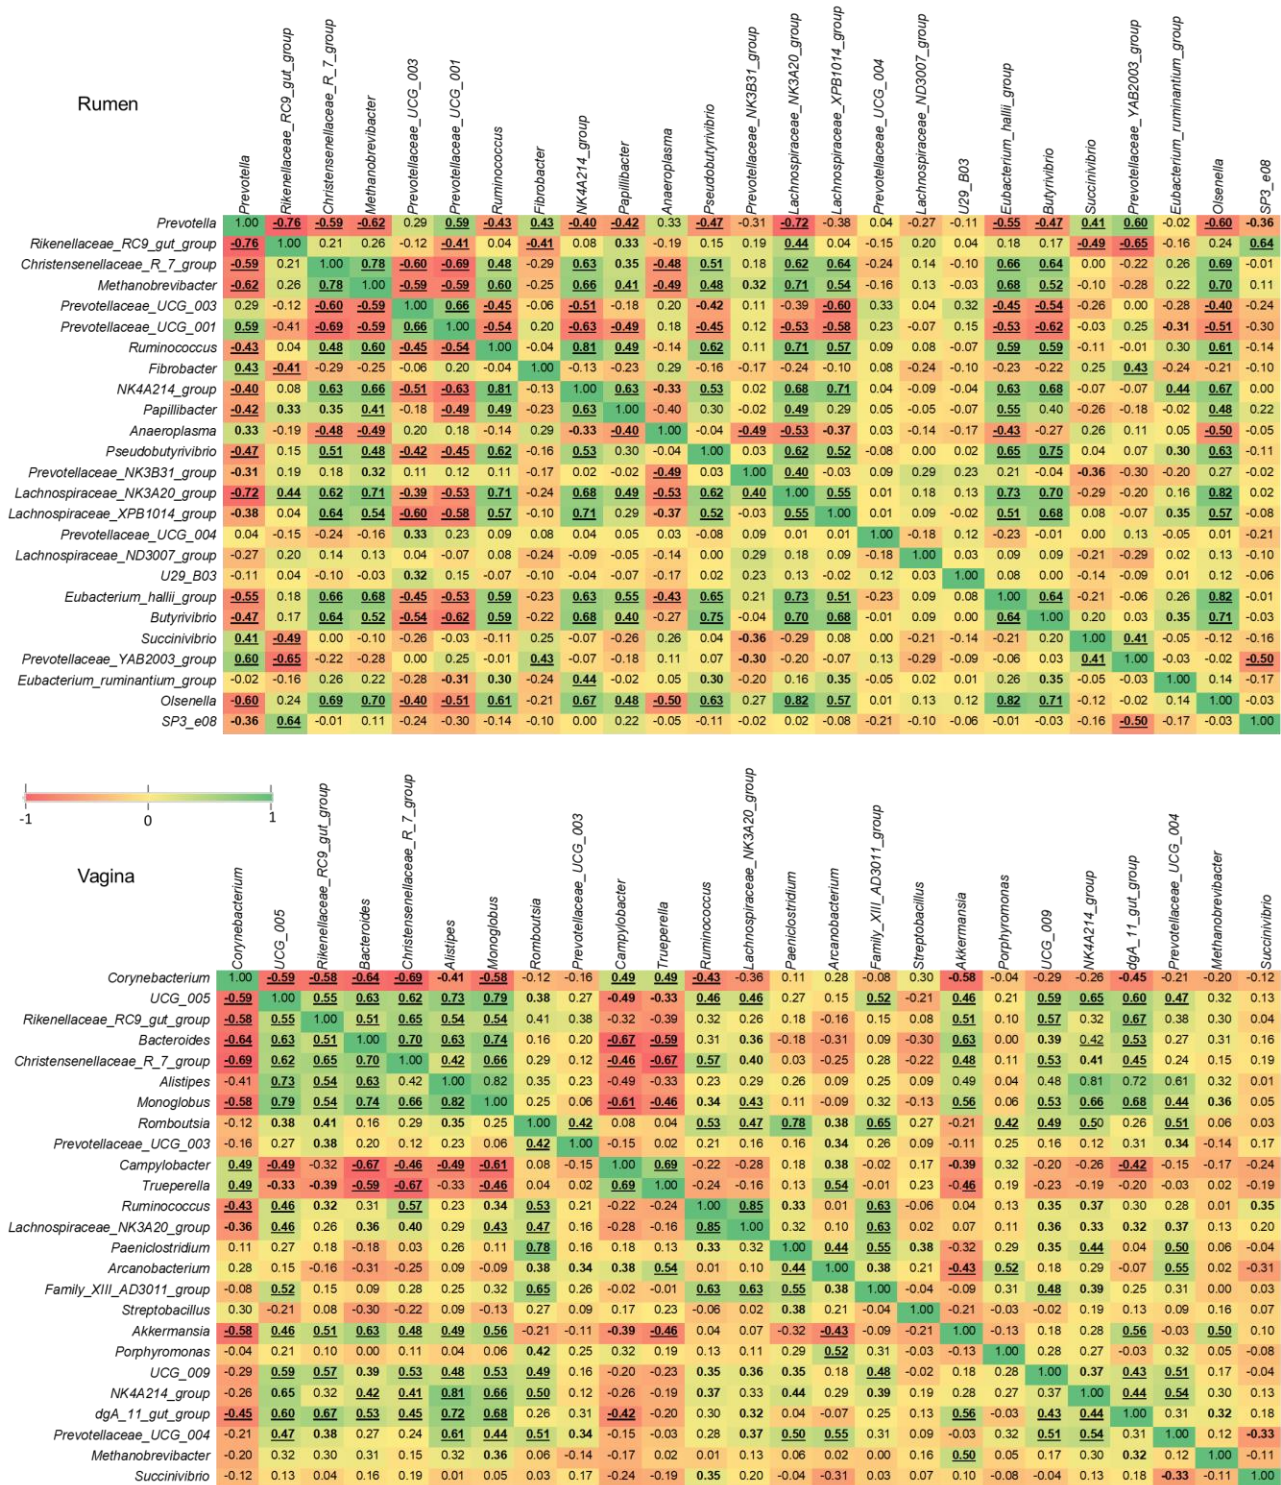

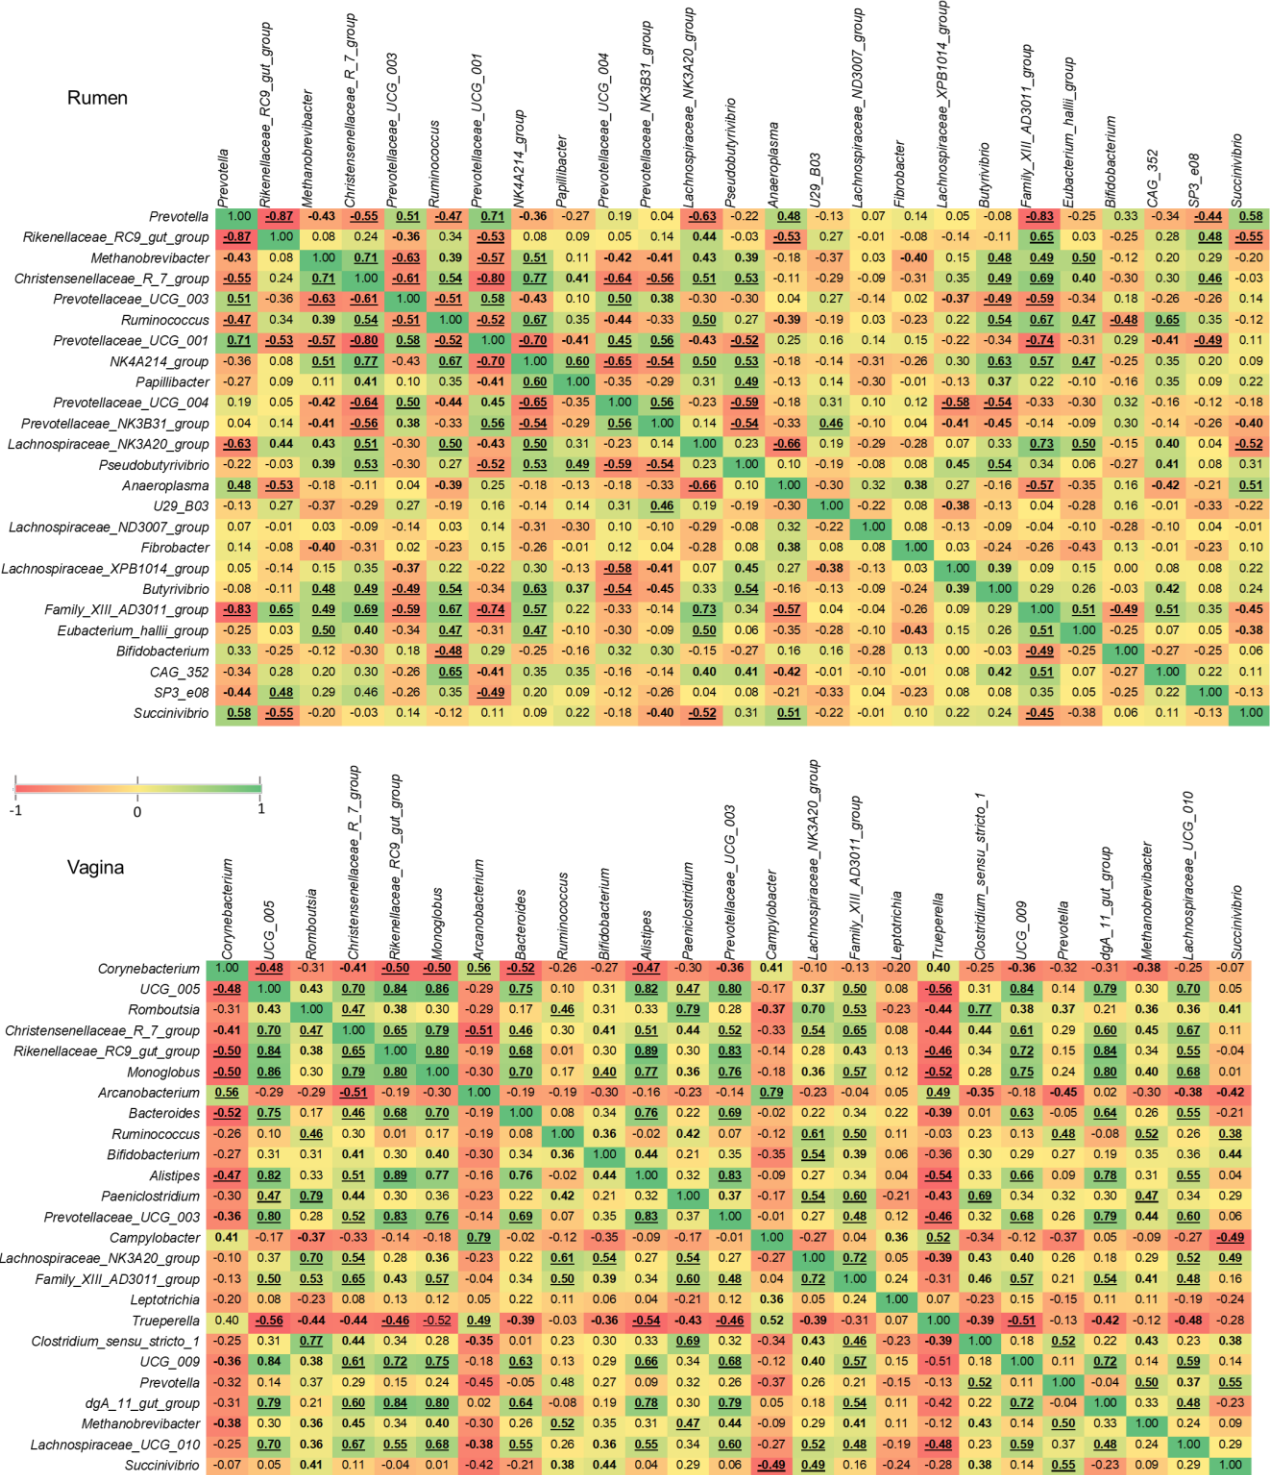



**Table 1.** Nutrient composition of the diets fed to the dams of virgin yearling heifers during the first 84 days of gestation, and virgin yearling heifers and pregnant heifers at the time of sample collection.

| Diet composition, % DM                     | Dams of virgin yearling |                 | Virgin yearling | Pregnant heifers |                  |
|--------------------------------------------|-------------------------|-----------------|-----------------|------------------|------------------|
|                                            | LG <sup>1</sup>         | MG <sup>2</sup> |                 | Control          | VTM <sup>3</sup> |
| Corn silage                                | 37                      | 29              | 20              | 30               | 30               |
| Prairie hay                                | 53                      | 41              | 70              | 59               | 59               |
| Dried distillers grains plus solubles      | 10                      | 5               | 5               | 6                | 6                |
| Premix                                     | -                       | -               | 5               | 5                | 5                |
| Energy and protein supplement <sup>1</sup> | -                       | 25              | -               | -                | -                |

<sup>1</sup>Basal total mixed rations (TMR) contained a commercially available mineral supplement (Purina® Wind & Rain® Storm® All-Season 7.5 Complete Mineral, Land O'Lakes Inc., Arden Hills, Minn.) fed at a rate of 113.4 gram per head per day, targeting gain of 0.28 kg/d.

<sup>2</sup>The supplement fed was an energy/protein supplement formulated with a blend of ground corn, DDGS, wheat midds, fish oil and urea, targeting gain of 0.79 kg/d.

<sup>3</sup>VTM: Vitamin mineral supplement was a pelleted product fed at 0.45 kg/head/day (consisting of 113 g of a vitamin and mineral supplement [Purina Wind & Rain Storm All-Season 7.5 Complete, Land O'Lakes Inc., Arden Hills, Minn.] and 337 g of a carrier) (Menezes et al., 2021).



**Table 2.** Percent relative abundance of the most relatively abundant genera in nasopharyngeal (n = 26), ruminal (n= 24) and vaginal (n = 27) microbiota of virgin yearling heifers that were born from the dams received a basal diet to achieve a moderate gain (MG) or to achieve a low gain (LG) during the first 84 days of gestation<sup>1</sup>

| Nasopharynx                          |      |      |      |      |         | Rumen                                  |      |      |      |      |         | Vagina                                |      |      |       |      |         |  |
|--------------------------------------|------|------|------|------|---------|----------------------------------------|------|------|------|------|---------|---------------------------------------|------|------|-------|------|---------|--|
| Genus                                | Rank | MG   | LG   | SEM  | P-value | Genus                                  | Rank | MG   | LG   | SEM  | P-value | Genus                                 | Rank | MG   | LG    | SEM  | P-value |  |
| <i>Mycoplasma</i>                    | 2    | 23.8 | 12.3 | 9.16 | 0.218   | <i>Prevotella</i>                      | 1    | 31.4 | 30.2 | 1.85 | 0.505   | <i>Corynebacterium</i>                | 1    | 8.75 | 12.00 | 2.54 | 0.209   |  |
| <i>Cellulomonas</i>                  | 3    | 5.41 | 6.40 | 1.92 | 0.608   | <i>Rikenellaceae RC9 gut group</i>     | 2    | 8.89 | 9.14 | 0.84 | 0.769   | <i>Oscillospiraceae UCG-005</i>       | 2    | 9.52 | 7.86  | 0.91 | 0.076   |  |
| <i>Filobacterium</i>                 | 4    | 2.62 | 8.03 | 3.00 | 0.081   | <i>Christensenellaceae R-7 group</i>   | 4    | 4.70 | 4.81 | 0.48 | 0.804   | <i>Rikenellaceae RC9 gut group</i>    | 4    | 4.30 | 3.87  | 0.51 | 0.406   |  |
| <i>Arthrobacter</i>                  | 5    | 2.36 | 2.05 | 0.51 | 0.546   | <i>Methanobrevibacter</i>              | 5    | 4.30 | 4.47 | 0.55 | 0.756   | <i>Bacteroides</i>                    | 5    | 4.15 | 3.95  | 0.62 | 0.757   |  |
| <i>Corynebacterium</i>               | 6    | 1.60 | 1.81 | 0.45 | 0.636   | <i>Prevotellaceae UCG-003</i>          | 7    | 3.82 | 3.77 | 0.19 | 0.803   | <i>Christensenellaceae R-7 group</i>  | 8    | 3.25 | 3.22  | 0.37 | 0.952   |  |
| <i>Nocardioides</i>                  | 7    | 1.77 | 1.65 | 0.60 | 0.842   | <i>Prevotellaceae UCG-001</i>          | 8    | 2.77 | 2.85 | 0.19 | 0.660   | <i>Alistipes</i>                      | 9    | 3.55 | 2.55  | 0.40 | 0.017   |  |
| <i>Oscillospiraceae UCG-005</i>      | 9    | 1.35 | 1.36 | 0.58 | 0.975   | <i>Ruminococcus</i>                    | 9    | 2.55 | 2.36 | 0.18 | 0.305   | <i>Monoglobus</i>                     | 10   | 2.83 | 2.44  | 0.29 | 0.182   |  |
| <i>Streptomyces</i>                  | 13   | 1.06 | 0.76 | 0.34 | 0.389   | <i>Fibrobacter</i>                     | 12   | 1.36 | 1.45 | 0.30 | 0.773   | <i>Romboutsia</i>                     | 11   | 2.44 | 1.89  | 0.28 | 0.061   |  |
| <i>Romboutsia</i>                    | 15   | 0.85 | 0.80 | 0.22 | 0.809   | <i>Oscillospiraceae NK4A214 group</i>  | 14   | 1.42 | 1.34 | 0.10 | 0.444   | <i>Prevotellaceae UCG-003</i>         | 13   | 1.71 | 1.79  | 0.29 | 0.771   |  |
| <i>Christensenellaceae R-7 group</i> | 16   | 0.83 | 0.71 | 0.31 | 0.702   | <i>Papillibacter</i>                   | 18   | 1.11 | 1.17 | 0.13 | 0.668   | <i>Campylobacter</i>                  | 16   | 1.24 | 1.69  | 1.03 | 0.668   |  |
| <i>Ornithinimicrobium</i>            | 18   | 0.55 | 0.72 | 0.31 | 0.600   | <i>Anaeroplasma</i>                    | 21   | 0.96 | 0.90 | 0.10 | 0.551   | <i>Trueperella</i>                    | 17   | 0.66 | 2.30  | 1.14 | 0.160   |  |
| <i>Rikenellaceae RC9 gut group</i>   | 19   | 0.49 | 0.56 | 0.18 | 0.697   | <i>Pseudobutyrvibrio</i>               | 22   | 0.82 | 0.81 | 0.05 | 0.856   | <i>Ruminococcus</i>                   | 18   | 1.64 | 1.20  | 0.19 | 0.025   |  |
| <i>Bacteroides</i>                   | 21   | 0.52 | 0.49 | 0.16 | 0.865   | <i>Prevotellaceae NK3B31 group</i>     | 26   | 0.69 | 0.79 | 0.08 | 0.193   | <i>Lachnospiraceae NK3A20 group</i>   | 21   | 1.07 | 0.90  | 0.17 | 0.307   |  |
| <i>Marmoricola</i>                   | 22   | 0.58 | 0.41 | 0.13 | 0.187   | <i>Lachnospiraceae NK3A20 group</i>    | 30   | 0.47 | 0.45 | 0.05 | 0.599   | <i>Paeniclostridium</i>               | 22   | 1.13 | 0.79  | 0.19 | 0.092   |  |
| <i>Ruminococcus</i>                  | 24   | 0.43 | 0.50 | 0.18 | 0.658   | <i>Lachnospiraceae XPB1014 group</i>   | 31   | 0.44 | 0.44 | 0.05 | 0.957   | <i>Arcanobacterium</i>                | 24   | 0.49 | 1.35  | 0.50 | 0.090   |  |
| <i>Lachnospiraceae NK3A20 group</i>  | 25   | 0.53 | 0.31 | 0.14 | 0.110   | <i>Prevotellaceae UCG-004</i>          | 32   | 0.44 | 0.41 | 0.05 | 0.547   | <i>Family XIII AD3011 group</i>       | 25   | 0.97 | 0.81  | 0.10 | 0.116   |  |
| <i>Prevotella</i>                    | 26   | 0.58 | 0.24 | 0.26 | 0.196   | <i>Lachnospiraceae ND3007 group</i>    | 33   | 0.39 | 0.44 | 0.06 | 0.429   | <i>Streptobacillus</i>                | 26   | 1.58 | 0.07  | 1.00 | 0.139   |  |
| <i>Ornithinococcus</i>               | 29   | 0.33 | 0.42 | 0.13 | 0.527   | <i>Rikenellaceae U29-B03</i>           | 34   | 0.40 | 0.41 | 0.07 | 0.997   | <i>Akkermansia</i>                    | 27   | 0.85 | 0.79  | 0.20 | 0.754   |  |
| <i>Clostridium sensu stricto 1</i>   | 30   | 0.41 | 0.34 | 0.14 | 0.615   | <i>[Eubacterium] hallii group</i>      | 36   | 0.40 | 0.38 | 0.03 | 0.573   | <i>Porphyromonas</i>                  | 28   | 0.34 | 1.23  | 1.01 | 0.382   |  |
| <i>Olsenella</i>                     | 31   | 0.32 | 0.39 | 0.14 | 0.618   | <i>Butyrivibrio</i>                    | 38   | 0.38 | 0.33 | 0.05 | 0.295   | <i>Butyricoccaceae UCG-009</i>        | 30   | 0.74 | 0.66  | 0.09 | 0.395   |  |
| <i>Bifidobacterium</i>               | 32   | 0.33 | 0.37 | 0.17 | 0.819   | <i>Succinivibrio</i>                   | 39   | 0.32 | 0.36 | 0.04 | 0.402   | <i>Oscillospiraceae NK4A214 group</i> | 31   | 0.81 | 0.56  | 0.09 | 0.010   |  |
| <i>Paeniclostridium</i>              | 33   | 0.40 | 0.31 | 0.11 | 0.393   | <i>Prevotellaceae YAB2003 group</i>    | 40   | 0.35 | 0.32 | 0.04 | 0.435   | <i>Rikenellaceae dgA-11 gut group</i> | 33   | 0.71 | 0.59  | 0.08 | 0.149   |  |
| <i>Prevotellaceae UCG-003</i>        | 35   | 0.43 | 0.22 | 0.13 | 0.111   | <i>[Eubacterium] ruminantium group</i> | 41   | 0.32 | 0.27 | 0.02 | 0.029   | <i>Prevotellaceae UCG-004</i>         | 37   | 0.68 | 0.54  | 0.11 | 0.209   |  |
| <i>Monoglobus</i>                    | 36   | 0.30 | 0.32 | 0.13 | 0.859   | <i>Olsenella</i>                       | 42   | 0.27 | 0.26 | 0.04 | 0.754   | <i>Lachnospiraceae UCG-010</i>        | 38   | 0.62 | 0.59  | 0.08 | 0.683   |  |
| <i>Rhodococcus</i>                   | 37   | 0.28 | 0.31 | 0.12 | 0.778   |                                        |      |      |      |      |         | <i>Clostridium sensu stricto 1</i>    | 39   | 0.54 | 0.68  | 0.21 | 0.514   |  |
| <i>Brachybacterium</i>               | 38   | 0.31 | 0.27 | 0.12 | 0.777   |                                        |      |      |      |      |         | <i>Olsenella</i>                      | 40   | 0.30 | 0.92  | 0.55 | 0.263   |  |
| <i>Mannheimia*</i>                   |      | 0.01 | 0.00 |      |         |                                        |      |      |      |      |         | <i>Alloprevotella</i>                 | 42   | 0.57 | 0.42  | 0.13 | 0.246   |  |
| <i>Pasteurella*</i>                  |      | 0.02 | 0.07 |      |         | <i>Fusobacterium*</i>                  |      | 0.01 | 0.02 |      |         |                                       |      |      |       |      |         |  |
| <i>Histophilus*</i>                  |      | 0.00 | 0.01 |      |         | <i>Trueperella*</i>                    |      | 0.00 | 0.00 |      |         | <i>Fusobacterium*</i>                 |      | 0.00 | 0.00  |      |         |  |

<sup>1</sup>The genera whose relative abundance was ranked within the top 42 are listed in this table and any ones within top 42 rank that were unclassified at genus level were excluded.

\*These genera included in this table because of their relevance to bovine respiratory disease and liver abscesses in cattle.

**Table 3.** Percent relative abundance of the 42 most relatively abundant genera in nasopharyngeal (n = 29), ruminal (n= 26) and vaginal (n = 27) microbiota of received diets without (CON) and with vitamin and mineral supplementation (VTM) during the first 6 months of gestation<sup>1</sup>

| Nasopharynx                          |      |      |      |      |         | Rumen                                 |      |       |       |      |         | Vagina                                |      |       |       |      |         |
|--------------------------------------|------|------|------|------|---------|---------------------------------------|------|-------|-------|------|---------|---------------------------------------|------|-------|-------|------|---------|
| Genus                                | Rank | CON  | VTM  | SEM  | P-value | Genus                                 | Rank | CON   | VTM   | SEM  | P-value | Genus                                 | Rank | CON   | VTM   | SEM  | P-value |
| <i>Cellulomonas</i>                  | 1    | 9.28 | 6.03 | 2.87 | 0.265   | <i>Prevotella</i>                     | 1    | 20.69 | 20.67 | 2.59 | 0.994   | <i>Corynebacterium</i>                | 1    | 18.68 | 12.25 | 5.22 | 0.227   |
| <i>Arthrobacter</i>                  | 2    | 6.87 | 7.20 | 1.40 | 0.820   | <i>Rikenellaceae RC9 gut group</i>    | 2    | 12.90 | 12.93 | 1.48 | 0.985   | <i>Oscillospiraceae UCG-005</i>       | 2    | 5.08  | 6.42  | 1.00 | 0.190   |
| <i>Mycoplasma</i>                    | 3    | 2.74 | 8.95 | 2.88 | 0.039   | <i>Methanobrevibacter</i>             | 3    | 6.95  | 6.97  | 0.84 | 0.985   | <i>Romboutsia</i>                     | 4    | 4.39  | 3.62  | 0.77 | 0.330   |
| <i>Corynebacterium</i>               | 5    | 5.23 | 4.26 | 1.01 | 0.342   | <i>Christensenellaceae R-7 group</i>  | 5    | 5.62  | 5.98  | 0.38 | 0.352   | <i>Christensenellaceae R-7 group</i>  | 5    | 3.16  | 3.86  | 0.60 | 0.244   |
| <i>Nocardioides</i>                  | 6    | 4.18 | 3.87 | 0.67 | 0.646   | <i>Prevotellaceae UCG-003</i>         | 7    | 3.22  | 3.00  | 0.23 | 0.348   | <i>Rikenellaceae RC9 gut group</i>    | 7    | 3.09  | 2.97  | 0.75 | 0.875   |
| <i>Filobacterium</i>                 | 8    | 3.29 | 1.70 | 1.32 | 0.238   | <i>Ruminococcus</i>                   | 9    | 2.38  | 2.58  | 0.18 | 0.283   | <i>Monoglobus</i>                     | 8    | 2.51  | 3.08  | 0.56 | 0.316   |
| <i>Streptomyces</i>                  | 9    | 2.24 | 2.24 | 0.40 | 0.995   | <i>Prevotellaceae UCG-001</i>         | 10   | 2.52  | 2.28  | 0.29 | 0.414   | <i>Arcanobacterium</i>                | 9    | 4.09  | 1.01  | 2.38 | 0.203   |
| <i>Oscillospiraceae UCG-005</i>      | 10   | 2.09 | 1.16 | 0.38 | 0.023   | <i>Oscillospiraceae NK4A214 group</i> | 11   | 1.41  | 1.73  | 0.13 | 0.024   | <i>Bacteroides</i>                    | 10   | 2.10  | 2.75  | 0.46 | 0.166   |
| <i>Romboutsia</i>                    | 11   | 1.56 | 1.30 | 0.19 | 0.194   | <i>Papillibacter</i>                  | 15   | 1.09  | 1.37  | 0.16 | 0.102   | <i>Ruminococcus</i>                   | 11   | 2.41  | 2.22  | 0.56 | 0.732   |
| <i>Bacteroides</i>                   | 12   | 1.45 | 1.20 | 0.54 | 0.644   | <i>Prevotellaceae UCG-004</i>         | 19   | 0.91  | 1.16  | 0.35 | 0.484   | <i>Bifidobacterium</i>                | 13   | 2.27  | 1.93  | 0.54 | 0.538   |
| <i>Porphyromonas</i>                 | 13   | 1.65 | 0.77 | 1.29 | 0.498   | <i>Prevotellaceae NK3B31 group</i>    | 21   | 1.06  | 0.95  | 0.16 | 0.515   | <i>Alistipes</i>                      | 14   | 1.89  | 2.06  | 0.45 | 0.709   |
| <i>Marmoricola</i>                   | 14   | 1.18 | 1.10 | 0.22 | 0.719   | <i>Lachnospiraceae NK3A20 group</i>   | 23   | 0.86  | 0.84  | 0.10 | 0.841   | <i>Paeniclostridium</i>               | 16   | 1.54  | 1.28  | 0.34 | 0.451   |
| <i>Salinimicrobium</i>               | 16   | 0.72 | 1.48 | 0.40 | 0.068   | <i>Pseudobutyrvibrio</i>              | 25   | 0.75  | 0.75  | 0.06 | 0.980   | <i>Prevotellaceae UCG-003</i>         | 17   | 1.52  | 1.20  | 0.42 | 0.460   |
| <i>Brachybacterium</i>               | 19   | 1.08 | 0.93 | 0.21 | 0.485   | <i>Anaeroplasma</i>                   | 26   | 0.68  | 0.59  | 0.08 | 0.303   | <i>Campylobacter</i>                  | 18   | 2.17  | 0.42  | 1.43 | 0.231   |
| <i>Ornithinococcus</i>               | 21   | 0.92 | 0.88 | 0.17 | 0.835   | <i>Rikenellaceae U29-B03</i>          | 29   | 0.41  | 0.45  | 0.11 | 0.761   | <i>Lachnospiraceae NK3A20 group</i>   | 20   | 0.98  | 1.20  | 0.28 | 0.451   |
| <i>Rhodococcus</i>                   | 22   | 0.84 | 0.78 | 0.16 | 0.683   | <i>Lachnospiraceae ND3007 group</i>   | 30   | 0.46  | 0.40  | 0.09 | 0.520   | <i>Family XIII AD3011 group</i>       | 21   | 0.95  | 1.09  | 0.19 | 0.477   |
| <i>Rikenellaceae RC9 gut group</i>   | 24   | 0.86 | 0.59 | 0.17 | 0.114   | <i>Fibrobacter</i>                    | 31   | 0.38  | 0.46  | 0.08 | 0.296   | <i>Leptotrichia</i>                   | 26   | 0.01  | 1.70  | 1.20 | 0.171   |
| <i>Christensenellaceae R-7 group</i> | 25   | 0.84 | 0.56 | 0.12 | 0.033   | <i>Lachnospiraceae XPB1014 group</i>  | 32   | 0.38  | 0.40  | 0.03 | 0.665   | <i>Trueperella</i>                    | 27   | 0.91  | 0.63  | 0.58 | 0.641   |
| <i>Bifidobacterium</i>               | 26   | 0.53 | 0.81 | 0.19 | 0.146   | <i>Butyrivibrio</i>                   | 33   | 0.36  | 0.42  | 0.03 | 0.046   | <i>Clostridium sensu stricto</i>      | 28   | 0.86  | 0.51  | 0.22 | 0.117   |
| <i>Saccharopolyspora</i>             | 27   | 0.69 | 0.63 | 0.15 | 0.698   | <i>Family XIII AD3011 group</i>       | 34   | 0.34  | 0.40  | 0.06 | 0.336   | <i>Butyricoccaceae UCG-009</i>        | 30   | 0.54  | 0.73  | 0.13 | 0.178   |
| <i>Alistipes</i>                     | 28   | 0.71 | 0.61 | 0.16 | 0.510   | <i>[Eubacterium] hallii group</i>     | 36   | 0.36  | 0.35  | 0.03 | 0.791   | <i>Prevotella</i>                     | 34   | 0.27  | 0.84  | 0.67 | 0.400   |
| <i>Paeniclostridium</i>              | 29   | 0.75 | 0.55 | 0.10 | 0.061   | <i>Bifidobacterium</i>                | 37   | 0.35  | 0.34  | 0.10 | 0.918   | <i>Rikenellaceae dgA-11 gut group</i> | 35   | 0.55  | 0.54  | 0.16 | 0.950   |
| <i>Ruminococcus</i>                  | 30   | 0.78 | 0.49 | 0.12 | 0.024   | <i>Ruminococcaceae CAG-352</i>        | 38   | 0.28  | 0.39  | 0.05 | 0.021   | <i>Methanobrevibacter</i>             | 37   | 0.59  | 0.45  | 0.29 | 0.618   |
| <i>Clostridium sensu stricto 1</i>   | 31   | 0.58 | 0.58 | 0.15 | 0.998   | <i>Rikenellaceae SP3-e08</i>          | 40   | 0.29  | 0.34  | 0.08 | 0.537   | <i>Lachnospiraceae UCG-010</i>        | 38   | 0.43  | 0.56  | 0.08 | 0.114   |
| <i>Lachnospiraceae NK3A20 group</i>  | 33   | 0.57 | 0.53 | 0.12 | 0.754   | <i>Anaerovorax</i>                    | 41   | 0.32  | 0.31  | 0.03 | 0.721   | <i>Streptobacillus</i>                | 39   | 0.03  | 0.93  | 0.74 | 0.229   |
| <i>Ornithinimicrobium</i>            | 34   | 0.65 | 0.44 | 0.10 | 0.049   | <i>Monoglobus</i>                     | 42   | 0.33  | 0.27  | 0.04 | 0.149   | <i>Oscillospiraceae NK4A214 group</i> | 41   | 0.47  | 0.48  | 0.10 | 0.932   |
| <i>Altererythrobacter</i>            | 35   | 0.60 | 0.45 | 0.13 | 0.240   |                                       |      |       |       |      |         | <i>Akkermansia</i>                    | 42   | 0.43  | 0.51  | 0.19 | 0.667   |
| <i>Microlunatus</i>                  | 36   | 0.58 | 0.45 | 0.10 | 0.191   |                                       |      |       |       |      |         |                                       |      |       |       |      |         |
| <i>Monoglobus</i>                    | 37   | 0.61 | 0.42 | 0.12 | 0.122   |                                       |      |       |       |      |         |                                       |      |       |       |      |         |
| <i>Mannheimia*</i>                   |      | 0.01 | 0.02 |      |         |                                       |      |       |       |      |         |                                       |      |       |       |      |         |
| <i>Pasteurella*</i>                  |      | 0.00 | 0.00 |      |         | <i>Fusobacterium*</i>                 |      | 0.17  | 0.07  |      |         |                                       |      |       |       |      |         |
| <i>Histophilus*</i>                  |      | 0.00 | 0.00 |      |         | <i>Trueperella*</i>                   |      | 0.00  | 0.00  |      |         | <i>Fusobacterium*</i>                 |      | 0.004 | 0.005 |      |         |

<sup>1</sup>The genera whose relative abundance was ranked within the top 42 are listed in this table and any ones within the top 42 rank that were unclassified at genus level were excluded.

\*These genera included in this table because of their relevance to bovine respiratory disease and liver abscesses in cattle

**Table 4.** OTUs identified in the nasopharyngeal, ruminal and vaginal microbiota of at least 60% of samples from virgin yearling heifers.

| OTU     | Taxa                                                                                                                                         | 60% | 65% | 70% | 75% | 80% | 85% | 90% | 95% | 100% |
|---------|----------------------------------------------------------------------------------------------------------------------------------------------|-----|-----|-----|-----|-----|-----|-----|-----|------|
| OTU8    | [k__Archaea, p__Euryarchaeota, c__Methanobacteria, o__Methanobacteriales, f__Methanobacteriaceae, g__Methanobrevibacter, s__NA]              |     |     |     |     |     |     |     |     |      |
| OTU23   | [k__Archaea, p__Euryarchaeota, c__Methanobacteria, o__Methanobacteriales, f__Methanobacteriaceae, g__Methanobrevibacter, s__ruminantium]     |     |     |     |     |     |     |     |     |      |
| OTU68   | [k__Bacteria, p__Actinobacteriota, c__Actinobacteria, o__Bifidobacteriales, f__Bifidobacteriaceae, g__Bifidobacterium, s__pseudolongum]      |     |     |     |     |     |     |     |     |      |
| OTU147  | [k__Bacteria, p__Actinobacteriota, c__Actinobacteria, o__Corynebacteriales, f__Corynebacteriaceae, g__Corynebacterium, s__marinum]           |     |     |     |     |     |     |     |     |      |
| OTU26   | [k__Bacteria, p__Actinobacteriota, c__Actinobacteria, o__Corynebacteriales, f__Corynebacteriaceae, g__Corynebacterium, s__NA]                |     |     |     |     |     |     |     |     |      |
| OTU160  | [k__Bacteria, p__Actinobacteriota, c__Actinobacteria, o__Micrococcales, f__Intrasporangiaceae, g__Ornithinimicrobium, s__NA]                 |     |     |     |     |     |     |     |     |      |
| OTU35   | [k__Bacteria, p__Actinobacteriota, c__Actinobacteria, o__Streptomycetales, f__Streptomycetaceae, g__Streptomyces, s__NA]                     |     |     |     |     |     |     |     |     |      |
| OTU351  | [k__Bacteria, p__Actinobacteriota, c__Coriobacteriia, o__Coriobacteriales, f__Atopobiaceae, g__Atopobium, s__NA]                             |     |     |     |     |     |     |     |     |      |
| OTU368  | [k__Bacteria, p__Actinobacteriota, c__Coriobacteriia, o__Coriobacteriales, f__Eggerthellaceae, g__DNF00809, s__NA]                           |     |     |     |     |     |     |     |     |      |
| OTU392  | [k__Bacteria, p__Firmicutes, c__Clostridia, o__Christensenellales, f__Christensenellaceae, g__Christensenellaceae R-7 group, s__NA]          |     |     |     |     |     |     |     |     |      |
| OTU537  | [k__Bacteria, p__Firmicutes, c__Clostridia, o__Christensenellales, f__Christensenellaceae, g__Christensenellaceae R-7 group, s__NA]          |     |     |     |     |     |     |     |     |      |
| OTU927  | [k__Bacteria, p__Firmicutes, c__Clostridia, o__Clostridia UCG-014, f__NA, g__NA, s__NA]                                                      |     |     |     |     |     |     |     |     |      |
| OTU97   | [k__Bacteria, p__Firmicutes, c__Clostridia, o__Hungateiclostridiaceae, f__Saccharofermentans, g__NA, s__NA]                                  |     |     |     |     |     |     |     |     |      |
| OTU133  | [k__Bacteria, p__Firmicutes, c__Clostridia, o__Lachnospirales, f__Lachnospiraceae, g__[Eubacterium] hallii group, s__NA]                     |     |     |     |     |     |     |     |     |      |
| OTU1335 | [k__Bacteria, p__Firmicutes, c__Clostridia, o__Lachnospirales, f__Lachnospiraceae, g__[Eubacterium] hallii group, s__NA]                     |     |     |     |     |     |     |     |     |      |
| OTU158  | [k__Bacteria, p__Firmicutes, c__Clostridia, o__Lachnospirales, f__Lachnospiraceae, g__[Eubacterium] hallii group, s__NA]                     |     |     |     |     |     |     |     |     |      |
| OTU3351 | [k__Bacteria, p__Firmicutes, c__Clostridia, o__Lachnospirales, f__Lachnospiraceae, g__[Eubacterium] hallii group, s__NA]                     |     |     |     |     |     |     |     |     |      |
| OTU489  | [k__Bacteria, p__Firmicutes, c__Clostridia, o__Lachnospirales, f__Lachnospiraceae, g__[Eubacterium] hallii group, s__NA]                     |     |     |     |     |     |     |     |     |      |
| OTU1111 | [k__Bacteria, p__Firmicutes, c__Clostridia, o__Lachnospirales, f__Lachnospiraceae, g__Coprococcus, s__NA]                                    |     |     |     |     |     |     |     |     |      |
| OTU1688 | [k__Bacteria, p__Firmicutes, c__Clostridia, o__Lachnospirales, f__Lachnospiraceae, g__Lachnospiraceae NK3A20 group, s__NA]                   |     |     |     |     |     |     |     |     |      |
| OTU1742 | [k__Bacteria, p__Firmicutes, c__Clostridia, o__Lachnospirales, f__Lachnospiraceae, g__Lachnospiraceae NK3A20 group, s__NA]                   |     |     |     |     |     |     |     |     |      |
| OTU373  | [k__Bacteria, p__Firmicutes, c__Clostridia, o__Lachnospirales, f__Lachnospiraceae, g__Lachnospiraceae NK3A20 group, s__NA]                   |     |     |     |     |     |     |     |     |      |
| OTU62   | [k__Bacteria, p__Firmicutes, c__Clostridia, o__Lachnospirales, f__Lachnospiraceae, g__Lachnospiraceae NK3A20 group, s__NA]                   |     |     |     |     |     |     |     |     |      |
| OTU657  | [k__Bacteria, p__Firmicutes, c__Clostridia, o__Lachnospirales, f__Lachnospiraceae, g__Lachnospiraceae NK3A20 group, s__NA]                   |     |     |     |     |     |     |     |     |      |
| OTU758  | [k__Bacteria, p__Firmicutes, c__Clostridia, o__Lachnospirales, f__Lachnospiraceae, g__Lachnospiraceae NK3A20 group, s__NA]                   |     |     |     |     |     |     |     |     |      |
| OTU882  | [k__Bacteria, p__Firmicutes, c__Clostridia, o__Lachnospirales, f__Lachnospiraceae, g__NA, s__NA]                                             |     |     |     |     |     |     |     |     |      |
| OTU25   | [k__Bacteria, p__Firmicutes, c__Clostridia, o__Oscillospirales, f__[Eubacterium] coprostanoligenes group, g__NA, s__NA]                      |     |     |     |     |     |     |     |     |      |
| OTU561  | [k__Bacteria, p__Firmicutes, c__Clostridia, o__Oscillospirales, f__Oscillospiraceae, g__Colidextribacter, s__NA]                             |     |     |     |     |     |     |     |     |      |
| OTU78   | [k__Bacteria, p__Firmicutes, c__Clostridia, o__Oscillospirales, f__Oscillospiraceae, g__NK4A214 group, s__NA]                                |     |     |     |     |     |     |     |     |      |
| OTU37   | [k__Bacteria, p__Firmicutes, c__Clostridia, o__Oscillospirales, f__Oscillospiraceae, g__UCG-005, s__NA]                                      |     |     |     |     |     |     |     |     |      |
| OTU188  | [k__Bacteria, p__Firmicutes, c__Clostridia, o__Oscillospirales, f__Ruminococcaceae, g__Ruminococcus, s__NA]                                  |     |     |     |     |     |     |     |     |      |
| OTU201  | [k__Bacteria, p__Firmicutes, c__Clostridia, o__Oscillospirales, f__Ruminococcaceae, g__Ruminococcus, s__NA]                                  |     |     |     |     |     |     |     |     |      |
| OTU29   | [k__Bacteria, p__Firmicutes, c__Clostridia, o__Oscillospirales, f__Ruminococcaceae, g__Ruminococcus, s__NA]                                  |     |     |     |     |     |     |     |     |      |
| OTU307  | [k__Bacteria, p__Firmicutes, c__Clostridia, o__Oscillospirales, f__Ruminococcaceae, g__Ruminococcus, s__NA]                                  |     |     |     |     |     |     |     |     |      |
| OTU441  | [k__Bacteria, p__Firmicutes, c__Clostridia, o__Oscillospirales, f__Ruminococcaceae, g__Ruminococcus, s__NA]                                  |     |     |     |     |     |     |     |     |      |
| OTU83   | [k__Bacteria, p__Firmicutes, c__Clostridia, o__Oscillospirales, f__Ruminococcaceae, g__Ruminococcus, s__NA]                                  |     |     |     |     |     |     |     |     |      |
| OTU244  | [k__Bacteria, p__Firmicutes, c__Clostridia, o__Oscillospirales, f__Ruminococcaceae, g__UCG-001, s__NA]                                       |     |     |     |     |     |     |     |     |      |
| OTU243  | [k__Bacteria, p__Firmicutes, c__Clostridia, o__Peptostreptococcales-Tissierellales, f__Anaerovoracaceae, g__Family XIII AD3011 group, s__NA] |     |     |     |     |     |     |     |     |      |
| OTU518  | [k__Bacteria, p__Firmicutes, c__Clostridia, o__Peptostreptococcales-Tissierellales, f__Anaerovoracaceae, g__Family XIII AD3011 group, s__NA] |     |     |     |     |     |     |     |     |      |
| OTU372  | [k__Bacteria, p__Firmicutes, c__Clostridia, o__Peptostreptococcales-Tissierellales, f__Anaerovoracaceae, g__Mogibacterium, s__NA]            |     |     |     |     |     |     |     |     |      |
| OTU24   | [k__Bacteria, p__Firmicutes, c__Clostridia, o__Peptostreptococcales-Tissierellales, f__Peptostreptococcaceae, g__Paeniclostridium, s__NA]    |     |     |     |     |     |     |     |     |      |
| OTU11   | [k__Bacteria, p__Firmicutes, c__Clostridia, o__Peptostreptococcales-Tissierellales, f__Peptostreptococcaceae, g__Romboutsia, s__ilealis]     |     |     |     |     |     |     |     |     |      |
| OTU1655 | [k__Bacteria, p__Proteobacteria, c__Alphaproteobacteria, o__Acetobacterales, f__Acetobacteraceae, g__Acetobacter, s__pasteurianus]           |     |     |     |     |     |     |     |     |      |

**Table 5.** OTUs identified in the nasopharyngeal, ruminal, and vaginal microbiota of at least 60% of samples from pregnant heifers.

| OUT     | Taxa                                                                                                                                         | 60% | 65% | 70% | 75% | 80% | 85% | 90% | 95% | 100% |
|---------|----------------------------------------------------------------------------------------------------------------------------------------------|-----|-----|-----|-----|-----|-----|-----|-----|------|
| OTU23   | [k__Archaea, p__Euryarchaeota, c__Methanobacteria, o__Methanobacteriales, f__Methanobacteriaceae, g__Methanobrevibacter, s__ruminantium]     |     |     |     |     |     |     |     |     |      |
| OTU56   | [k__Bacteria, p__Actinobacteriota, c__Actinobacteria, o__Bifidobacteriales, f__Bifidobacteriaceae, g__Bifidobacterium, s__merycicum]         |     |     |     |     |     |     |     |     |      |
| OTU68   | [k__Bacteria, p__Actinobacteriota, c__Actinobacteria, o__Bifidobacteriales, f__Bifidobacteriaceae, g__Bifidobacterium, s__pseudolongum]      |     |     |     |     |     |     |     |     |      |
| OTU105  | [k__Bacteria, p__Actinobacteriota, c__Actinobacteria, o__Corynebacteriales, f__Corynebacteriaceae, g__Corynebacterium, s__crudilactis]       |     |     |     |     |     |     |     |     |      |
| OTU147  | [k__Bacteria, p__Actinobacteriota, c__Actinobacteria, o__Corynebacteriales, f__Corynebacteriaceae, g__Corynebacterium, s__marinum]           |     |     |     |     |     |     |     |     |      |
| OTU26   | [k__Bacteria, p__Actinobacteriota, c__Actinobacteria, o__Corynebacteriales, f__Corynebacteriaceae, g__Corynebacterium, s__NA]                |     |     |     |     |     |     |     |     |      |
| OTU3812 | [k__Bacteria, p__Actinobacteriota, c__Actinobacteria, o__Corynebacteriales, f__Corynebacteriaceae, g__Corynebacterium, s__NA]                |     |     |     |     |     |     |     |     |      |
| OTU272  | [k__Bacteria, p__Actinobacteriota, c__Actinobacteria, o__Corynebacteriales, f__Corynebacteriaceae, g__Corynebacterium, s__provencense]       |     |     |     |     |     |     |     |     |      |
| OTU160  | [k__Bacteria, p__Actinobacteriota, c__Actinobacteria, o__Micrococcales, f__Intrasporangiaceae, g__Ornithinimicrobium, s__NA]                 |     |     |     |     |     |     |     |     |      |
| OTU20   | [k__Bacteria, p__Actinobacteriota, c__Actinobacteria, o__Micrococcales, f__Micrococcaceae, g__Arthrobacter, s__castelli]                     |     |     |     |     |     |     |     |     |      |
| OTU14   | [k__Bacteria, p__Actinobacteriota, c__Actinobacteria, o__Micrococcales, f__Micrococcaceae, g__Arthrobacter, s__pigmenti]                     |     |     |     |     |     |     |     |     |      |
| OTU352  | [k__Bacteria, p__Actinobacteriota, c__Actinobacteria, o__Micrococcales, f__Micrococcaceae, g__Paeniglutamibacter, s__NA]                     |     |     |     |     |     |     |     |     |      |
| OTU76   | [k__Bacteria, p__Actinobacteriota, c__Actinobacteria, o__Propionibacteriales, f__Nocardoidaceae, g__Marmoricola, s__NA]                      |     |     |     |     |     |     |     |     |      |
| OTU80   | [k__Bacteria, p__Actinobacteriota, c__Actinobacteria, o__Propionibacteriales, f__Nocardoidaceae, g__Nocardioides, s__jensenii]               |     |     |     |     |     |     |     |     |      |
| OTU377  | [k__Bacteria, p__Actinobacteriota, c__Actinobacteria, o__Propionibacteriales, f__Propionibacteriaceae, g__Cutibacterium, s__acnes]           |     |     |     |     |     |     |     |     |      |
| OTU35   | [k__Bacteria, p__Actinobacteriota, c__Actinobacteria, o__Streptomycetales, f__Streptomycetaceae, g__Streptomyces, s__NA]                     |     |     |     |     |     |     |     |     |      |
| OTU370  | [k__Bacteria, p__Firmicutes, c__Clostridia, o__Clostridia UCG-014, f__NA, g__NA, s__NA]                                                      |     |     |     |     |     |     |     |     |      |
| OTU927  | [k__Bacteria, p__Firmicutes, c__Clostridia, o__Clostridia UCG-014, f__NA, g__NA, s__NA]                                                      |     |     |     |     |     |     |     |     |      |
| OTU119  | [k__Bacteria, p__Firmicutes, c__Clostridia, o__Clostridiales, f__Clostridiaceae, g__Clostridium sensu stricto 1, s__NA]                      |     |     |     |     |     |     |     |     |      |
| OTU43   | [k__Bacteria, p__Firmicutes, c__Clostridia, o__Hungateiclostridiaceae, f__Saccharofermentans, g__NA, s__NA]                                  |     |     |     |     |     |     |     |     |      |
| OTU97   | [k__Bacteria, p__Firmicutes, c__Clostridia, o__Hungateiclostridiaceae, f__Saccharofermentans, g__NA, s__NA]                                  |     |     |     |     |     |     |     |     |      |
| OTU489  | [k__Bacteria, p__Firmicutes, c__Clostridia, o__Lachnospirales, f__Lachnospiraceae, g__[Eubacterium] hallii group, s__NA]                     |     |     |     |     |     |     |     |     |      |
| OTU90   | [k__Bacteria, p__Firmicutes, c__Clostridia, o__Lachnospirales, f__Lachnospiraceae, g__Dorea, s__NA]                                          |     |     |     |     |     |     |     |     |      |
| OTU62   | [k__Bacteria, p__Firmicutes, c__Clostridia, o__Lachnospirales, f__Lachnospiraceae, g__Lachnospiraceae NK3A20 group, s__NA]                   |     |     |     |     |     |     |     |     |      |
| OTU295  | [k__Bacteria, p__Firmicutes, c__Clostridia, o__Lachnospirales, f__Lachnospiraceae, g__Lachnospiraceae NK3A20 group, s__NA]                   |     |     |     |     |     |     |     |     |      |
| OTU373  | [k__Bacteria, p__Firmicutes, c__Clostridia, o__Lachnospirales, f__Lachnospiraceae, g__Lachnospiraceae NK3A20 group, s__NA]                   |     |     |     |     |     |     |     |     |      |
| OTU986  | [k__Bacteria, p__Firmicutes, c__Clostridia, o__Lachnospirales, f__Lachnospiraceae, g__Lachnospiraceae NK3A20 group, s__NA]                   |     |     |     |     |     |     |     |     |      |
| OTU1688 | [k__Bacteria, p__Firmicutes, c__Clostridia, o__Lachnospirales, f__Lachnospiraceae, g__Lachnospiraceae NK3A20 group, s__NA]                   |     |     |     |     |     |     |     |     |      |
| OTU897  | [k__Bacteria, p__Firmicutes, c__Clostridia, o__Lachnospirales, f__Lachnospiraceae, g__Syntrophococcus, s__NA]                                |     |     |     |     |     |     |     |     |      |
| OTU25   | [k__Bacteria, p__Firmicutes, c__Clostridia, o__Oscillospirales, f__[Eubacterium] coprostanoligenes group, g__NA, s__NA]                      |     |     |     |     |     |     |     |     |      |
| OTU78   | [k__Bacteria, p__Firmicutes, c__Clostridia, o__Oscillospirales, f__Oscillospiraceae, g__NK4A214 group, s__NA]                                |     |     |     |     |     |     |     |     |      |
| OTU37   | [k__Bacteria, p__Firmicutes, c__Clostridia, o__Oscillospirales, f__Oscillospiraceae, g__UCG-005, s__NA]                                      |     |     |     |     |     |     |     |     |      |
| OTU54   | [k__Bacteria, p__Firmicutes, c__Clostridia, o__Oscillospirales, f__Oscillospiraceae, g__UCG-005, s__NA]                                      |     |     |     |     |     |     |     |     |      |
| OTU360  | [k__Bacteria, p__Firmicutes, c__Clostridia, o__Oscillospirales, f__Ruminococcaceae, g__NA, s__NA]                                            |     |     |     |     |     |     |     |     |      |
| OTU29   | [k__Bacteria, p__Firmicutes, c__Clostridia, o__Oscillospirales, f__Ruminococcaceae, g__Ruminococcus, s__NA]                                  |     |     |     |     |     |     |     |     |      |
| OTU83   | [k__Bacteria, p__Firmicutes, c__Clostridia, o__Oscillospirales, f__Ruminococcaceae, g__Ruminococcus, s__NA]                                  |     |     |     |     |     |     |     |     |      |
| OTU188  | [k__Bacteria, p__Firmicutes, c__Clostridia, o__Oscillospirales, f__Ruminococcaceae, g__Ruminococcus, s__NA]                                  |     |     |     |     |     |     |     |     |      |
| OTU201  | [k__Bacteria, p__Firmicutes, c__Clostridia, o__Oscillospirales, f__Ruminococcaceae, g__Ruminococcus, s__NA]                                  |     |     |     |     |     |     |     |     |      |
| OTU244  | [k__Bacteria, p__Firmicutes, c__Clostridia, o__Oscillospirales, f__Ruminococcaceae, g__UCG-001, s__NA]                                       |     |     |     |     |     |     |     |     |      |
| OTU243  | [k__Bacteria, p__Firmicutes, c__Clostridia, o__Peptostreptococcales-Tissierellales, f__Anaerovoracaceae, g__Family XIII AD3011 group, s__NA] |     |     |     |     |     |     |     |     |      |



**Table 6.** OTUs identified in the nasopharyngeal, ruminal and vaginal microbiota of 60% of samples from yearling and pregnant heifers.

| OUT     | Taxa                                                                                                                                         | 60% | 65% | 70% | 75% | 80% | 85% | 90% | 95% | 100% |
|---------|----------------------------------------------------------------------------------------------------------------------------------------------|-----|-----|-----|-----|-----|-----|-----|-----|------|
| OTU8    | [k__Archaea, p__Euryarchaeota, c__Methanobacteria, o__Methanobacteriales, f__Methanobacteriaceae, g__Methanobrevibacter, s__NA]              |     |     |     |     |     |     |     |     |      |
| OTU23   | [k__Archaea, p__Euryarchaeota, c__Methanobacteria, o__Methanobacteriales, f__Methanobacteriaceae, g__Methanobrevibacter, s__ruminantium]     |     |     |     |     |     |     |     |     |      |
| OTU56   | [k__Bacteria, p__Actinobacteriota, c__Actinobacteria, o__Bifidobacteriales, f__Bifidobacteriaceae, g__Bifidobacterium, s__merycicum]         |     |     |     |     |     |     |     |     |      |
| OTU68   | [k__Bacteria, p__Actinobacteriota, c__Actinobacteria, o__Bifidobacteriales, f__Bifidobacteriaceae, g__Bifidobacterium, s__pseudolongum]      |     |     |     |     |     |     |     |     |      |
| OTU105  | [k__Bacteria, p__Actinobacteriota, c__Actinobacteria, o__Corynebacteriales, f__Corynebacteriaceae, g__Corynebacterium, s__crudilactis]       |     |     |     |     |     |     |     |     |      |
| OTU147  | [k__Bacteria, p__Actinobacteriota, c__Actinobacteria, o__Corynebacteriales, f__Corynebacteriaceae, g__Corynebacterium, s__marinum]           |     |     |     |     |     |     |     |     |      |
| OTU26   | [k__Bacteria, p__Actinobacteriota, c__Actinobacteria, o__Corynebacteriales, f__Corynebacteriaceae, g__Corynebacterium, s__NA]                |     |     |     |     |     |     |     |     |      |
| OTU272  | [k__Bacteria, p__Actinobacteriota, c__Actinobacteria, o__Corynebacteriales, f__Corynebacteriaceae, g__Corynebacterium, s__provencense]       |     |     |     |     |     |     |     |     |      |
| OTU160  | [k__Bacteria, p__Actinobacteriota, c__Actinobacteria, o__Micrococcales, f__Intrasporangiaceae, g__Ornithinimicrobium, s__NA]                 |     |     |     |     |     |     |     |     |      |
| OTU35   | [k__Bacteria, p__Actinobacteriota, c__Actinobacteria, o__Streptomycetales, f__Streptomycetaceae, g__Streptomyces, s__NA]                     |     |     |     |     |     |     |     |     |      |
| OTU351  | [k__Bacteria, p__Actinobacteriota, c__Coriobacteriia, o__Coriobacteriales, f__Atopobiaceae, g__Atopobium, s__NA]                             |     |     |     |     |     |     |     |     |      |
| OTU537  | [k__Bacteria, p__Firmicutes, c__Clostridia, o__Christensenellales, f__Christensenellaceae, g__Christensenellaceae R-7 group, s__NA]          |     |     |     |     |     |     |     |     |      |
| OTU370  | [k__Bacteria, p__Firmicutes, c__Clostridia, o__Clostridia UCG-014, f__NA, g__NA, s__NA]                                                      |     |     |     |     |     |     |     |     |      |
| OTU927  | [k__Bacteria, p__Firmicutes, c__Clostridia, o__Clostridia UCG-014, f__NA, g__NA, s__NA]                                                      |     |     |     |     |     |     |     |     |      |
| OTU43   | [k__Bacteria, p__Firmicutes, c__Clostridia, o__Hungateiclostridiaceae, f__Saccharofermentans, g__NA, s__NA]                                  |     |     |     |     |     |     |     |     |      |
| OTU97   | [k__Bacteria, p__Firmicutes, c__Clostridia, o__Hungateiclostridiaceae, f__Saccharofermentans, g__NA, s__NA]                                  |     |     |     |     |     |     |     |     |      |
| OTU133  | [k__Bacteria, p__Firmicutes, c__Clostridia, o__Lachnospirales, f__Lachnospiraceae, g__[Eubacterium] hallii group, s__NA]                     |     |     |     |     |     |     |     |     |      |
| OTU158  | [k__Bacteria, p__Firmicutes, c__Clostridia, o__Lachnospirales, f__Lachnospiraceae, g__[Eubacterium] hallii group, s__NA]                     |     |     |     |     |     |     |     |     |      |
| OTU489  | [k__Bacteria, p__Firmicutes, c__Clostridia, o__Lachnospirales, f__Lachnospiraceae, g__[Eubacterium] hallii group, s__NA]                     |     |     |     |     |     |     |     |     |      |
| OTU62   | [k__Bacteria, p__Firmicutes, c__Clostridia, o__Lachnospirales, f__Lachnospiraceae, g__Lachnospiraceae NK3A20 group, s__NA]                   |     |     |     |     |     |     |     |     |      |
| OTU373  | [k__Bacteria, p__Firmicutes, c__Clostridia, o__Lachnospirales, f__Lachnospiraceae, g__Lachnospiraceae NK3A20 group, s__NA]                   |     |     |     |     |     |     |     |     |      |
| OTU657  | [k__Bacteria, p__Firmicutes, c__Clostridia, o__Lachnospirales, f__Lachnospiraceae, g__Lachnospiraceae NK3A20 group, s__NA]                   |     |     |     |     |     |     |     |     |      |
| OTU1688 | [k__Bacteria, p__Firmicutes, c__Clostridia, o__Lachnospirales, f__Lachnospiraceae, g__Lachnospiraceae NK3A20 group, s__NA]                   |     |     |     |     |     |     |     |     |      |
| OTU25   | [k__Bacteria, p__Firmicutes, c__Clostridia, o__Oscillospirales, f__[Eubacterium] coprostanoligenes group, g__NA, s__NA]                      |     |     |     |     |     |     |     |     |      |
| OTU78   | [k__Bacteria, p__Firmicutes, c__Clostridia, o__Oscillospirales, f__Oscillospiraceae, g__NK4A214 group, s__NA]                                |     |     |     |     |     |     |     |     |      |
| OTU37   | [k__Bacteria, p__Firmicutes, c__Clostridia, o__Oscillospirales, f__Oscillospiraceae, g__UCG-005, s__NA]                                      |     |     |     |     |     |     |     |     |      |
| OTU54   | [k__Bacteria, p__Firmicutes, c__Clostridia, o__Oscillospirales, f__Oscillospiraceae, g__UCG-005, s__NA]                                      |     |     |     |     |     |     |     |     |      |
| OTU360  | [k__Bacteria, p__Firmicutes, c__Clostridia, o__Oscillospirales, f__Ruminococcaceae, g__NA, s__NA]                                            |     |     |     |     |     |     |     |     |      |
| OTU29   | [k__Bacteria, p__Firmicutes, c__Clostridia, o__Oscillospirales, f__Ruminococcaceae, g__Ruminococcus, s__NA]                                  |     |     |     |     |     |     |     |     |      |
| OTU83   | [k__Bacteria, p__Firmicutes, c__Clostridia, o__Oscillospirales, f__Ruminococcaceae, g__Ruminococcus, s__NA]                                  |     |     |     |     |     |     |     |     |      |
| OTU188  | [k__Bacteria, p__Firmicutes, c__Clostridia, o__Oscillospirales, f__Ruminococcaceae, g__Ruminococcus, s__NA]                                  |     |     |     |     |     |     |     |     |      |
| OTU201  | [k__Bacteria, p__Firmicutes, c__Clostridia, o__Oscillospirales, f__Ruminococcaceae, g__Ruminococcus, s__NA]                                  |     |     |     |     |     |     |     |     |      |
| OTU307  | [k__Bacteria, p__Firmicutes, c__Clostridia, o__Oscillospirales, f__Ruminococcaceae, g__Ruminococcus, s__NA]                                  |     |     |     |     |     |     |     |     |      |
| OTU244  | [k__Bacteria, p__Firmicutes, c__Clostridia, o__Oscillospirales, f__Ruminococcaceae, g__UCG-001, s__NA]                                       |     |     |     |     |     |     |     |     |      |
| OTU243  | [k__Bacteria, p__Firmicutes, c__Clostridia, o__Peptostreptococcales-Tissierellales, f__Anaerovoracaceae, g__Family XIII AD3011 group, s__NA] |     |     |     |     |     |     |     |     |      |
| OTU518  | [k__Bacteria, p__Firmicutes, c__Clostridia, o__Peptostreptococcales-Tissierellales, f__Anaerovoracaceae, g__Family XIII AD3011 group, s__NA] |     |     |     |     |     |     |     |     |      |
| OTU372  | [k__Bacteria, p__Firmicutes, c__Clostridia, o__Peptostreptococcales-Tissierellales, f__Anaerovoracaceae, g__Mogibacterium, s__NA]            |     |     |     |     |     |     |     |     |      |
| OTU24   | [k__Bacteria, p__Firmicutes, c__Clostridia, o__Peptostreptococcales-Tissierellales, f__Peptostreptococcaceae, g__Paeniclostridium, s__NA]    |     |     |     |     |     |     |     |     |      |
| OTU11   | [k__Bacteria, p__Firmicutes, c__Clostridia, o__Peptostreptococcales-Tissierellales, f__Peptostreptococcaceae, g__Romboutsia, s__ilealis]     |     |     |     |     |     |     |     |     |      |

|         |                                                                                                                                     |  |  |
|---------|-------------------------------------------------------------------------------------------------------------------------------------|--|--|
| OTU32   | [k__Bacteria, p__Firmicutes, c__Clostridia, o__Peptostreptococcales-Tissierellales, f__Peptostreptococcaceae, g__Romboutsia, s__NA] |  |  |
| OTU1655 | [k__Bacteria, p__Proteobacteria, c__Alphaproteobacteria, o__Acetobacterales, f__Acetobacteraceae, g__Acetobacter, s__pasteurianus]  |  |  |

---



## References:

- Abe, F., N. Ishibashi, and S. Shimamura. 1995. Effect of administration of bifidobacteria and lactic acid bacteria to newborn calves and piglets. *J Dairy Sci* 78(12):2838-2846. doi: 10.3168/jds.S0022-0302(95)76914-4
- Alipour, M. J., J. Jalanka, T. Pessa-Morikawa, T. Kokkonen, R. Satokari, U. Hynönen, A. Iivanainen, and M. Niku. 2018. The composition of the perinatal intestinal microbiota in cattle. *Sci Rep* 8(1):10437. doi: 10.1038/s41598-018-28733-y
- Amat, S., D. B. Holman, E. Timsit, T. Schwinghamer, and T. W. Alexander. 2019. Evaluation of the Nasopharyngeal Microbiota in Beef Cattle Transported to a Feedlot, With a Focus on Lactic Acid-Producing Bacteria. *Front Microbiol* 10:1988. doi: 10.3389/fmicb.2019.01988
- Bartenslager, A. C., N. D. Althuge, J. D. Loy, M. M. Hille, M. L. Spangler, and S. C. Fernando. 2021. Longitudinal assessment of the bovine ocular bacterial community dynamics in calves. *Anim Microbiome* 3(1):16. doi: 10.1186/s42523-021-00079-3
- Baumgaertner, F. U., Sarah R. McCarthy, Kacie L. and et al. 2020. 87 Effects of energy supplementation during early gestation in beef heifers on body weight, concentrations of IGF-1, and calf characteristics. *Journal of Animal Science* 98:163-164. doi: <https://doi.org/10.1093/jas/skaa278.299>
- Beauchemin, K. A., E. M. Ungerfeld, R. J. Eckard, and M. Wang. 2020. Review: Fifty years of research on rumen methanogenesis: lessons learned and future challenges for mitigation. *Animal* 14(S1):s2-s16. doi: 10.1017/S1751731119003100
- Calatayud, M., O. Koren, and M. C. Collado. 2019. Maternal Microbiome and Metabolic Health Program Microbiome Development and Health of the Offspring. *Trends Endocrinol Metab* 30(10):735-744. doi: 10.1016/j.tem.2019.07.021
- Callahan, B. J., P. J. McMurdie, M. J. Rosen, A. W. Han, A. J. Johnson, and S. P. Holmes. 2016. DADA2: High-resolution sample inference from Illumina amplicon data. *Nat Methods* 13(7):581-583. doi: 10.1038/nmeth.3869
- Caton, J. S., M. S. Crouse, L. P. Reynolds, T. L. Neville, C. R. Dahlen, A. K. Ward, and K. C. Swanson. 2019. Maternal nutrition and programming of offspring energy requirements. *Transl Anim Sci* 3(3):976-990. doi: 10.1093/tas/txy127
- Cholewińska, P., W. Górniak, and K. Wojnarowski. 2021. Impact of selected environmental factors on microbiome of the digestive tract of ruminants. *BMC Vet Res* 17(1):25. doi: 10.1186/s12917-021-02742-y
- Codagnone, M. G., C. Stanton, S. M. O'Mahony, T. G. Dinan, and J. F. Cryan. 2019. Microbiota and Neurodevelopmental Trajectories: Role of Maternal and Early-Life Nutrition. *Ann Nutr Metab* 74 Suppl 2:16-27. doi: 10.1159/000499144
- Crouse, M. S., N. P. Greseth, K. J. McLean, M. R. Crosswhite, N. N. Pereira, A. K. Ward, L. P. Reynolds, C. R. Dahlen, B. W. Neville, P. P. Borowicz, and J. S. Caton. 2019. Maternal nutrition and stage of early pregnancy in beef heifers: impacts on hexose and AA concentrations in maternal and fetal fluids1. *J Anim Sci* 97(3):1296-1316. doi: 10.1093/jas/skz013
- Danielsson, R., J. Dicksved, L. Sun, H. Gonda, B. Müller, A. Schnürer, and J. Bertilsson. 2017. Methane Production in Dairy Cows Correlates with Rumen Methanogenic and Bacterial Community Structure. *Front Microbiol* 8:226. doi: 10.3389/fmicb.2017.00226
- Denman, S. E., G. Martinez Fernandez, T. Shinkai, M. Mitsumori, and C. S. McSweeney. 2015. Metagenomic analysis of the rumen microbial community following inhibition of methane formation by a halogenated methane analog. *Front Microbiol* 6:1087. doi: 10.3389/fmicb.2015.01087
- Derakhshani, H., K. B. Fehr, S. Sepehri, D. Francoz, J. De Buck, H. W. Barkema, J. C. Plaizier, and E. Khafipour. 2018. Invited review: Microbiota of the bovine udder: Contributing factors and potential implications for udder health and mastitis susceptibility. *J Dairy Sci* 101(12):10605-10625. doi: 10.3168/jds.2018-14860
- Diniz, W. J. S., L. P. Reynolds, P. P. Borowicz, A. K. Ward, K. K. Sedivec, K. L. McCarthy, C. J. Kassetas, F. Baumgaertner, J. D. Kirsch, S. T. Dorsam, T. L. Neville, J. C. Forcherio, R. R. Scott, J. S. Caton, and C.



- R. Dahlen. 2021. Maternal Vitamin and Mineral Supplementation and Rate of Maternal Weight Gain Affects Placental Expression of Energy Metabolism and Transport-Related Genes. *Genes (Basel)* 12(3)doi: 10.3390/genes12030385
- Franco-Lopez, J., M. Duplessis, A. Bui, C. Reymond, W. Poisson, L. Blais, J. Chong, R. Gervais, D. E. Rico, R. I. Cue, C. L. Girard, and J. Ronholm. 2020. Correlations between the Composition of the Bovine Microbiota and Vitamin B. *mSystems* 5(2)doi: 10.1128/mSystems.00107-20
- Galvão, K. N., R. C. Bicalho, and S. J. Jeon. 2019. Symposium review: The uterine microbiome associated with the development of uterine disease in dairy cows. *J Dairy Sci* 102(12):11786-11797. doi: 10.3168/jds.2019-17106
- Granja-Salcedo, Y. T., R. M. Fernandes, R. C. de Araujo, L. T. Kishi, T. T. Berchielli, F. D. de Resende, A. Berndt, and G. R. Siqueira. 2019. Long-Term Encapsulated Nitrate Supplementation Modulates Rumen Microbial Diversity and Rumen Fermentation to Reduce Methane Emission in Grazing Steers. *Front Microbiol* 10:614. doi: 10.3389/fmicb.2019.00614
- Greening, C., R. Geier, C. Wang, L. C. Woods, S. E. Morales, M. J. McDonald, R. Rushton-Green, X. C. Morgan, S. Koike, S. C. Leahy, W. J. Kelly, I. Cann, G. T. Attwood, G. M. Cook, and R. I. Mackie. 2019. Diverse hydrogen production and consumption pathways influence methane production in ruminants. *ISME J* 13(10):2617-2632. doi: 10.1038/s41396-019-0464-2
- Guzman, C. E., L. T. Bereza-Malcolm, B. De Groef, and A. E. Franks. 2015. Presence of Selected Methanogens, Fibrolytic Bacteria, and Proteobacteria in the Gastrointestinal Tract of Neonatal Dairy Calves from Birth to 72 Hours. *PLoS One* 10(7):e0133048. doi: 10.1371/journal.pone.0133048
- Guzman, C. E., J. L. Wood, E. Egidi, A. C. White-Monsant, L. Semene, S. V. H. Grommen, E. L. Hill-Yardin, B. De Groef, and A. E. Franks. 2020. A pioneer calf foetus microbiome. *Sci Rep* 10(1):17712. doi: 10.1038/s41598-020-74677-7
- Holman, D. B., E. Timsit, S. Amat, D. W. Abbott, A. G. Buret, and T. W. Alexander. 2017. The nasopharyngeal microbiota of beef cattle before and after transport to a feedlot. *BMC Microbiol* 17(1):70. doi: 10.1186/s12866-017-0978-6
- Hook, S. E., A. D. Wright, and B. W. McBride. 2010. Methanogens: methane producers of the rumen and mitigation strategies. *Archaea* 2010:945785. doi: 10.1155/2010/945785
- Huda, M. N., S. M. Ahmad, K. M. Kalanetra, D. H. Taft, M. J. Alam, A. Khanam, R. Raqib, M. A. Underwood, D. A. Mills, and C. B. Stephensen. 2019. Neonatal Vitamin A Supplementation and Vitamin A Status Are Associated with Gut Microbiome Composition in Bangladeshi Infants in Early Infancy and at 2 Years of Age. *J Nutr* 149(6):1075-1088. doi: 10.1093/jn/nxz034
- Johnson, K. K., and D. L. Pendell. 2017. Market Impacts of Reducing the Prevalence of Bovine Respiratory Disease in United States Beef Cattle Feedlots. *Front Vet Sci* 4:189. doi: 10.3389/fvets.2017.00189
- Kelly, W. J., S. C. Leahy, E. Altermann, C. J. Yeoman, J. C. Dunne, Z. Kong, D. M. Pacheco, D. Li, S. J. Noel, C. D. Moon, A. L. Cookson, and G. T. Attwood. 2010. The glyco-biome of the rumen bacterium *Butyrivibrio proteoclasticus* B316(T) highlights adaptation to a polysaccharide-rich environment. *PLoS One* 5(8):e11942. doi: 10.1371/journal.pone.0011942
- Kimura, I., J. Miyamoto, R. Ohue-Kitano, K. Watanabe, T. Yamada, M. Onuki, R. Aoki, Y. Isobe, D. Kashihara, D. Inoue, A. Inaba, Y. Takamura, S. Taira, S. Kumaki, M. Watanabe, M. Ito, F. Nakagawa, J. Irie, H. Kakuta, M. Shinohara, K. Iwatsuki, G. Tsujimoto, H. Ohno, M. Arita, H. Itoh, and K. Hase. 2020. Maternal gut microbiota in pregnancy influences offspring metabolic phenotype in mice. *Science* 367(6481)doi: 10.1126/science.aaw8429
- Kissels, W., X. Wu, and R. R. Santos. 2017. Short communication: Interaction of the isomers carvacrol and thymol with the antibiotics doxycycline and tilmicosin: In vitro effects against pathogenic bacteria commonly found in the respiratory tract of calves. *J Dairy Sci* 100(2):970-974. doi: 10.3168/jds.2016-11536
- Laguardia-Nascimento, M., K. M. Branco, M. R. Gasparini, S. Giannattasio-Ferraz, L. R. Leite, F. M. Araujo, A. C. Salim, J. R. Nicoli, G. C. de Oliveira, and E. F. Barbosa-Stancioli. 2015. Vaginal Microbiome

- Characterization of Nellore Cattle Using Metagenomic Analysis. *PLoS One* 10(11):e0143294. doi: 10.1371/journal.pone.0143294
- Li, P., T. Tang, X. Chang, X. Fan, X. Chen, R. Wang, C. Fan, and K. Qi. 2019. Abnormality in Maternal Dietary Calcium Intake During Pregnancy and Lactation Promotes Body Weight Gain by Affecting the Gut Microbiota in Mouse Offspring. *Mol Nutr Food Res* 63(5):e1800399. doi: 10.1002/mnfr.201800399
- Lugli, G. A., S. Duranti, K. Albert, L. Mancabelli, S. Napoli, A. Viappiani, R. Anzalone, G. Longhi, C. Milani, F. Turrone, G. Alessandri, D. A. Sela, D. van Sinderen, and M. Ventura. 2019. Unveiling Genomic Diversity among Members of the Species. *Appl Environ Microbiol* 85(8)doi: 10.1128/AEM.03065-18
- McLean, K. J., M. S. Crouse, M. R. Crosswhite, N. N. Pereira, C. R. Dahlen, P. P. Borowicz, L. P. Reynolds, A. K. Ward, B. W. Neville, and J. S. Caton. 2017. Impacts of maternal nutrition on uterine and placental vascularity and mRNA expression of angiogenic factors during the establishment of pregnancy in beef heifers. *Transl Anim Sci* 1(2):160-167. doi: 10.2527/tas2017.0019
- McMullen, C., T. W. Alexander, R. Léguillette, M. Workentine, and E. Timsit. 2020. Topography of the respiratory tract bacterial microbiota in cattle. *Microbiome* 8(1):91. doi: 10.1186/s40168-020-00869-y
- McMurdie, P. J., and S. Holmes. 2013. phyloseq: an R package for reproducible interactive analysis and graphics of microbiome census data. *PLoS One* 8(4):e61217. doi: 10.1371/journal.pone.0061217
- Mee, J. F., P. A. Rogers, and K. J. O'Farrell. 1995. Effect of feeding a mineral-vitamin supplement before calving on the calving performance of a trace element deficient dairy herd. *Vet Rec* 137(20):508-512. doi: 10.1136/vr.137.20.508
- Menezes, A. C. B., K. L. McCarthy, C. J. Kassetas, F. Baumgaertner, J. D. Kirsch, S. Dorsam, T. L. Neville, A. K. Ward, P. P. Borowicz, L. P. Reynolds, K. K. Sedivec, J. C. Forcherio, R. Scott, J. S. Caton, and C. R. Dahlen. 2021. Vitamin and mineral supplementation and rate of gain during the first trimester of gestation affect concentrations of amino acids in maternal serum and allantoinic fluid of beef heifers. *J Anim Sci* 99(2)doi: 10.1093/jas/skab024
- Nadeem Aslam, M., C. M. Bassis, L. Zhang, S. Zaidi, J. Varani, and I. L. Bergin. 2016. Calcium Reduces Liver Injury in Mice on a High-Fat Diet: Alterations in Microbial and Bile Acid Profiles. *PLoS One* 11(11):e0166178. doi: 10.1371/journal.pone.0166178
- NASEM. 2016. Nutrient Requirements of Beef Cattle: Eighth Revised Edition. The National Academies Press, Washington, DC.
- Neubauer, V., E. Humer, E. Mann, I. Kröger, N. Reisinger, M. Wagner, Q. Zebeli, and R. M. Petri. 2019. Effects of clay mineral supplementation on particle-associated and epimural microbiota, and gene expression in the rumen of cows fed high-concentrate diet. *Anaerobe* 59:38-48. doi: 10.1016/j.anaerobe.2019.05.003
- O'Hara, E., A. L. A. Neves, Y. Song, and L. L. Guan. 2020. The Role of the Gut Microbiome in Cattle Production and Health: Driver or Passenger? *Annu Rev Anim Biosci* 8:199-220. doi: 10.1146/annurev-animal-021419-083952
- Palmer, A. C. 2011. Nutritionally mediated programming of the developing immune system. *Adv Nutr* 2(5):377-395. doi: 10.3945/an.111.000570
- Quast, C., E. Pruesse, P. Yilmaz, J. Gerken, T. Schweer, P. Yarza, J. Peplies, and F. O. Glöckner. 2013. The SILVA ribosomal RNA gene database project: improved data processing and web-based tools. *Nucleic Acids Res* 41(Database issue):D590-596. doi: 10.1093/nar/gks1219
- Stiemsma, L. T., and K. B. Michels. 2018. The Role of the Microbiome in the Developmental Origins of Health and Disease. *Pediatrics* 141(4)doi: 10.1542/peds.2017-2437
- Talsness, C. E., J. Penders, E. H. J. M. Jansen, J. Damoiseaux, C. Thijs, and M. Mommers. 2017. Influence of vitamin D on key bacterial taxa in infant microbiota in the KOALA Birth Cohort Study. *PLoS One* 12(11):e0188011. doi: 10.1371/journal.pone.0188011
- Tapio, I., D. Fischer, L. Blasco, M. Tapio, R. J. Wallace, A. R. Bayat, L. Ventto, M. Kahala, E. Negussie, K. J. Shingfield, and J. Vilkki. 2017. Taxon abundance, diversity, co-occurrence and network analysis of the ruminal microbiota in response to dietary changes in dairy cows. *PLoS One* 12(7):e0180260. doi: 10.1371/journal.pone.0180260

- Timsit, E., C. McMullen, S. Amat, and T. W. Alexander. 2020. Respiratory Bacterial Microbiota in Cattle: From Development to Modulation to Enhance Respiratory Health. *Vet Clin North Am Food Anim Pract* 36(2):297-320. doi: 10.1016/j.cvfa.2020.03.001
- Trautvetter, U., A. Camarinha-Silva, G. Jahreis, S. Lorkowski, and M. Gleis. 2018. High phosphorus intake and gut-related parameters - results of a randomized placebo-controlled human intervention study. *Nutr J* 17(1):23. doi: 10.1186/s12937-018-0331-4
- Van Emon, M., C. Sanford, and S. McCoski. 2020. Impacts of Bovine Trace Mineral Supplementation on Maternal and Offspring Production and Health. *Animals (Basel)* 10(12)doi: 10.3390/ani10122404
- Vuong, H. E., G. N. Pronovost, D. W. Williams, E. J. L. Coley, E. L. Siegler, A. Qiu, M. Kazantsev, C. J. Wilson, T. Rendon, and E. Y. Hsiao. 2020. The maternal microbiome modulates fetal neurodevelopment in mice. *Nature* 586(7828):281-286. doi: 10.1038/s41586-020-2745-3
- Wang, Q., G. M. Garrity, J. M. Tiedje, and J. R. Cole. 2007. Naive Bayesian classifier for rapid assignment of rRNA sequences into the new bacterial taxonomy. *Appl Environ Microbiol* 73(16):5261-5267. doi: 10.1128/AEM.00062-07
- Wilde, D. 2006. Influence of macro and micro minerals in the peri-parturient period on fertility in dairy cattle. *Anim Reprod Sci* 96(3-4):240-249. doi: 10.1016/j.anireprosci.2006.08.004
- Xu, J., C. Xu, X. Chen, X. Cai, S. Yang, Y. Sheng, and T. Wang. 2014. Regulation of an antioxidant blend on intestinal redox status and major microbiota in early weaned piglets. *Nutrition* 30(5):584-589. doi: 10.1016/j.nut.2013.10.018
- Yang, Q., Q. Liang, B. Balakrishnan, D. P. Belobrajdic, Q. J. Feng, and W. Zhang. 2020. Role of Dietary Nutrients in the Modulation of Gut Microbiota: A Narrative Review. *Nutrients* 12(2)doi: 10.3390/nu12020381
- Yao, Y., X. Cai, C. Chen, H. Fang, Y. Zhao, W. Fei, F. Chen, and C. Zheng. 2020. The Role of Microbiomes in Pregnant Women and Offspring: Research Progress of Recent Years. *Front Pharmacol* 11:643. doi: 10.3389/fphar.2020.00643
- Zeineldin, M., J. Lowe, and B. Aldridge. 2019. Contribution of the Mucosal Microbiota to Bovine Respiratory Health. *Trends Microbiol* 27(9):753-770. doi: 10.1016/j.tim.2019.04.005
- Zinicola, M., F. Lima, S. Lima, V. Machado, M. Gomez, D. Döpfer, C. Guard, and R. Bicalho. 2015. Altered microbiomes in bovine digital dermatitis lesions, and the gut as a pathogen reservoir. *PLoS One* 10(3):e0120504. doi: 10.1371/journal.pone.0120504
